# Supplementary material for: Molecular phylogeny of Squaliformes and first occurrence of bioluminescence in sharks
Source: Springer Nature journal article supplement (doi:10.1186/s12862-015-0446-6), 2015-08-15
Supplement: 12862_2015_446_MOESM1_ESM.pdf [file 12862_2015_446_MOESM1_ESM.pdf]

**Additional file 1: analyses documentation**

Table S1. List of species analysed.

| <b>Genus</b>          | <b>Species</b>       | <b>GJPN tissue collection number</b> |
|-----------------------|----------------------|--------------------------------------|
| <i>Squalus</i>        | <i>acanthias</i>     | GN6336                               |
| <i>Cirrhigaleus</i>   | <i>asper</i>         | GN3831                               |
| <i>Centrophorus</i>   | <i>moluccensis</i>   | GN8086                               |
| <i>Deania</i>         | sp.                  | GN7456                               |
| <i>Dalatias</i>       | <i>licha</i>         | GN1006                               |
| <i>Isistius</i>       | <i>brasiliensis</i>  | GN3748                               |
| <i>Squaliolus</i>     | <i>aliae</i>         | GN6176                               |
| <i>Euprotomicrus</i>  | <i>bispinatus</i>    | GN3749                               |
| <i>Somniosus</i>      | <i>microcephalus</i> | GN1156                               |
| <i>Zameus</i>         | <i>squamulosus</i>   | GN7131                               |
| <i>Scymnodon</i>      | <i>ringens</i>       | GN1703                               |
| <i>Centroselachus</i> | <i>crepidater</i>    | GN7127                               |
| <i>Centroscymnus</i>  | <i>coelolepis</i>    | GN6626                               |
| <i>Scymnodon</i>      | <i>plunketi</i>      | GN5607                               |
| <i>Oxynotus</i>       | <i>paradoxus</i>     | GN1852                               |
| <i>Aculeola</i>       | <i>nigra</i>         | GN7450                               |
| <i>Centroscyllium</i> | <i>fabricii</i>      | GN8195                               |
| <i>Etmopterus</i>     | <i>splendidus</i>    | GN10139                              |
| <i>Etmopterus</i>     | <i>sheikoi</i>       | GN12278                              |
| <i>Etmopterus</i>     | cf. <i>molleri</i>   | GN10014                              |
| <i>Etmopterus</i>     | <i>spinax</i>        | GN5162                               |
| <i>Etmopterus</i>     | <i>gracilispinis</i> | GN7458                               |
| <i>Trigonognathus</i> | <i>kabeyai</i>       | GN12280                              |
| <i>Echinorhinus</i>   | <i>brucus</i>        | GN1983                               |
| <i>Pliotrema</i>      | <i>warreni</i>       | GN7338                               |
| <i>Pristiophorus</i>  | <i>japonicus</i>     | GN1049                               |
| <i>Squatina</i>       | <i>nebulosa</i>      | GN10161                              |
| <i>Hexanchus</i>      | <i>griseus</i>       | GN2342                               |

Table S2. Completeness statistics for captured data, raw dataset (cds = coding sequences; bp = basepairs).

|                                               |            |                                               |
|-----------------------------------------------|------------|-----------------------------------------------|
| <b>Average number of genes captured:</b>      | 1000       | Out of 1265 possible                          |
| <b>Completeness by cds:</b>                   | 74.57%     | 27,357 cds present out of 36,685              |
| <b>Completeness by position in alignment:</b> | 59.59 %    | 6,163,401 positions present out of 10,343,865 |
| <b>Average sequence length per specimen:</b>  | 201,099 bp | Out of 352,605 possible                       |

Search for phylogenetically informative loci using MARE

```

MARE OUTPUT
original multiple sequence alignment
-----
information content of B   : 0.11
matrix saturation        : 0.746
nr of taxa               : 29
nr of partitions         : 1264

Parameters
-----
weighting of inform. content : 3
weighting of taxa           : 1
number of evaluated quartets : 20000

reduced multiple sequence alignment
-----
information content of B'   : 0.357
nr of taxa                 : 29
nr of partitions           : 174
ratio of reduced and complete matrix : 0.138
matrix saturation          : 0.922

```

Figure S1: Overview of the MARE [33, 34] analysis. Rows show analysed taxa, columns different loci. Each locus is represented for each taxon by a cell. Cell colors code for the information content of loci: white cells = gene absent; red cells = treelikeness equals 0; different stages of blue to black cells = treelikeness is 0.1 – 1.

(A) Information content (treelikeness) for the full set of 1265 loci and 29 taxa.

(B) Reduced dataset after exclusion of uninformative loci (174 loci).

For a high resolution image please download Figure S1 directly from the Dryad data repository:

<http://datadryad.org/review?doi=doi:10.5061/dryad.n3581>

(A) Full Dataset

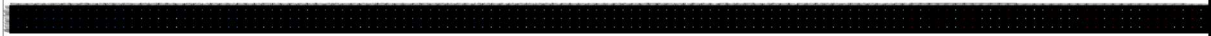

(B) Reduced Dataset

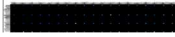

PERL Script used to re-blast 174 loci resulting from the MARE analysis against the reference genome of *Callorhinchus milii* to check for multiple hits

```
#!/usr/bin/perl -w
#
# Name: reblast.pl
#
# This script is used to re-blast blastout sequences of each gene to the genome of designing baits and
bin sequences into genes.
#
# Datafile: fasta file of the query and fasta files of the genes
#
# Input: the subject name and query name
#
# Output: blastn output file in format 6, sequences binned as genes.
#
# sample: ./reblast.pl -subject="Oreochromis_niloticus" -query="Gobioidei"
#
# Written by
#         Chenhong Li, Ting Kuang
#         Shanghai Ocean University, China.
#         Created on Sep 2014
#         Last modified on
use strict;
use warnings;
use Getopt::Long; # include the module for input
```

```
my $subject; #genome sequence need make blast database
my $query; #folder containing all gene data file
my $opt = GetOptions( 'subject:s', \$subject,
                    'query:s', \$query); #set command line options

my $resultdir = $query . ".result";
`mkdir ../genebin/$resultdir`;#make dir for the output
my $resultlog = $query . ".log";
`mkdir ../genebin/$resultlog`;#make dir for the para log

#call outside program makeblastdb
#`makeblastdb -in ../subject/$subject.fas -out ../blastdb/$subject -dbtype nucl`;

my $que = "../query/$query";
opendir (DIR, $que) or die $!; #open folder containing all gene data file

while (my $file = readdir (DIR)) { #read all gene file under local alignment out folder
    next if ($file =~ /^\.\/); #skip files beginning with
    (my $gene) = $file =~ /(\S+)\.fas/;
    my @file = split (/s/, $file); #split the names of gene
    chomp(@file);
    my @sortedfile = sort @file;

    foreach my $file (@sortedfile) {##call outside program blastn

        `blastn -query $que/$file -db ../blastdb/$subject -out ../blastout/$gene.blast.out.txt -word_size 7 -
        gapopen 5 -gapextend 2 -penalty -1 -reward 1 -evalue 0.000001 -outfmt 6`;

        my ($BLAST_FILE, $FASTA_FILE, $RESULT_FILE, $RESULT_LOG);
        my $blastout = "../blastout";
```



```

my $nspecieslag = "a";
while (my $newline = readline ($BLAST_FILE)) {
    chomp $newline;
    my ($nspecies, $nseqid, $npos1, $npos2) = $newline =~
/(\S+)\s+(\S+)\s+\S+\s+\S+\s+\S+\s+\S+\s+\S+\s+\S+\s+(\S+)\s+(\S+)\s+\S+\s+\S+;/;
    ($npos1, $npos2) = ($npos2, $npos1) if ($npos1 > $npos2);

    next if ($nspecies eq $nspecieslag);
    if ($nseqid ne $seqid) {
        print $RESULT_LOG ">$nspecies\n$note_seq{$nspecies}\n";
    } else {
        if ($npos2 <= $npos1) {
            print $RESULT_LOG ">$nspecies\n$note_seq{$nspecies}\n";
        } elsif ($npos1 >= $npos2){
            print $RESULT_LOG ">$nspecies\n$note_seq{$nspecies}\n";
        } else {
            print $RESULT_FILE ">$nspecies\n$note_seq{$nspecies}\n";
        }
    }
    $nspecieslag = $nspecies;
}

close ($BLAST_FILE) or die "Can't close $blast";
close ($FASTA_FILE) or die "Can't close $path";
close ($RESULT_FILE) or die "Can't close $new";
close ($RESULT_LOG) or die "Cant't close $log";

}
}

closedir (DIR);

```

Information on single loci used for phylogenetic and all subsequent analyses

Table S3A: Information on single alignments of 172 loci used for final analyses:

|           | # CDS | External name | # Sequences in alignment | Query Sequence Length (bp) | Max Sequence Length captured (bp) | Min Sequence Length captured (bp) |
|-----------|-------|---------------|--------------------------|----------------------------|-----------------------------------|-----------------------------------|
| <b>1</b>  | cd23  | CDH23         | 28                       | 453                        | 450                               | 111                               |
| <b>2</b>  | cd28  | UNC13C        | 28                       | 1428                       | 1413                              | 495                               |
| <b>3</b>  | cd30  | PLCE1         | 28                       | 681                        | 681                               | 243                               |
| <b>4</b>  | cd55  | DNAH1         | 25                       | 189                        | 189                               | 99                                |
| <b>5</b>  | cd66  | SLC35B2       | 24                       | 648                        | 606                               | 36                                |
| <b>6</b>  | cd99  | MED7          | 28                       | 519                        | 516                               | 123                               |
| <b>7</b>  | cd118 | ALG11         | 27                       | 252                        | 252                               | 117                               |
| <b>8</b>  | cd120 | MYCBP2        | 24                       | 222                        | 222                               | 141                               |
| <b>9</b>  | cd127 | DYNC1H1       | 27                       | 210                        | 210                               | 126                               |
| <b>10</b> | cd137 | ABC1          | 20                       | 213                        | 213                               | 93                                |
| <b>11</b> | cd153 | CHTF18        | 21                       | 210                        | 207                               | 123                               |
| <b>12</b> | cd170 | ASB2          | 27                       | 483                        | 480                               | 123                               |
| <b>13</b> | cd191 | DNAH10        | 26                       | 231                        | 231                               | 120                               |
| <b>14</b> | cd203 | GUCD1         | 24                       | 228                        | 228                               | 132                               |
| <b>15</b> | cd236 | SMCR8         | 27                       | 423                        | 423                               | 123                               |
| <b>16</b> | cd258 | INTS2         | 26                       | 222                        | 222                               | 90                                |
| <b>17</b> | cd267 | ABCC3         | 26                       | 300                        | 300                               | 117                               |
| <b>18</b> | cd272 | CEP192        | 20                       | 204                        | 201                               | 105                               |
| <b>19</b> | cd284 | ACOX1         | 18                       | 204                        | 204                               | 96                                |
| <b>20</b> | cd285 | FLI1          | 25                       | 204                        | 201                               | 93                                |
| <b>21</b> | cd295 | BAIAP2        | 23                       | 225                        | 225                               | 72                                |
| <b>22</b> | cd299 | ZZEF1         | 15                       | 258                        | 258                               | 168                               |
| <b>23</b> | cd300 | DHX33         | 24                       | 258                        | 255                               | 165                               |
| <b>24</b> | cd302 | SUPT5H        | 25                       | 198                        | 198                               | 111                               |
| <b>25</b> | cd324 | AP4B1         | 25                       | 226                        | 223                               | 1                                 |
| <b>26</b> | cd329 | RP2           | 28                       | 474                        | 471                               | 123                               |
| <b>27</b> | cd330 | TMEM60        | 26                       | 378                        | 375                               | 69                                |
| <b>28</b> | cd334 | TGFBRAP1      | 28                       | 678                        | 678                               | 159                               |
| <b>29</b> | cd353 | DYNC2H1       | 27                       | 375                        | 375                               | 171                               |
| <b>30</b> | cd354 | CTSC          | 27                       | 591                        | 498                               | 186                               |
| <b>31</b> | cd357 | DSTYK         | 27                       | 375                        | 375                               | 135                               |
| <b>32</b> | cd362 | EPRS          | 20                       | 207                        | 207                               | 132                               |
| <b>33</b> | cd388 | AMDHD1        | 28                       | 276                        | 273                               | 129                               |
| <b>34</b> | cd393 | MIEF1         | 26                       | 219                        | 216                               | 69                                |
| <b>35</b> | cd404 | ZDHHC23       | 26                       | 204                        | 204                               | 120                               |
| <b>36</b> | cd405 | IMPG2         | 26                       | 207                        | 207                               | 93                                |
| <b>37</b> | cd426 | VWA1          | 27                       | 531                        | 495                               | 207                               |
| <b>38</b> | cd438 | PANX2         | 28                       | 1203                       | 1200                              | 396                               |

|    | # CDS | External name | # Sequences in alignment | Query Sequence Length (bp) | Max Sequence Length captured (bp) | Min Sequence Length captured (bp) |
|----|-------|---------------|--------------------------|----------------------------|-----------------------------------|-----------------------------------|
| 39 | cd441 | VPS13D        | 28                       | 696                        | 693                               | 120                               |
| 40 | cd447 | PEX2          | 28                       | 831                        | 828                               | 141                               |
| 41 | cd451 | NAGLU         | 28                       | 561                        | 561                               | 201                               |
| 42 | cd465 | MON2          | 28                       | 621                        | 618                               | 183                               |
| 43 | cd469 | TMEM168       | 28                       | 504                        | 504                               | 129                               |
| 44 | cd472 | RAG1          | 28                       | 1650                       | 1650                              | 168                               |
| 45 | cd473 | YOD1          | 28                       | 606                        | 606                               | 147                               |
| 46 | cd481 | LRRC30        | 27                       | 717                        | 714                               | 201                               |
| 47 | cd484 | TGFBRAP1      | 27                       | 336                        | 336                               | 162                               |
| 48 | cd485 | NPC1          | 28                       | 219                        | 219                               | 114                               |
| 49 | cd487 | SS18          | 25                       | 219                        | 216                               | 42                                |
| 50 | cd490 | PRKDC         | 27                       | 198                        | 198                               | 108                               |
| 51 | cd494 | CYP7A1        | 28                       | 546                        | 546                               | 162                               |
| 52 | cd506 | BAMBI         | 26                       | 285                        | 282                               | 147                               |
| 53 | cd514 | TTN           | 27                       | 270                        | 270                               | 144                               |
| 54 | cd520 | MALRD1        | 24                       | 231                        | 231                               | 69                                |
| 55 | cd521 | C10orf112     | 27                       | 366                        | 363                               | 120                               |
| 56 | cd522 | OSGEPL1       | 28                       | 381                        | 381                               | 126                               |
| 57 | cd550 | POMGNT2       | 28                       | 1728                       | 1728                              | 123                               |
| 58 | cd554 | NPHP3         | 23                       | 240                        | 240                               | 147                               |
| 59 | cd564 | SCAP          | 27                       | 319                        | 319                               | 97                                |
| 60 | cd567 | MOCOS         | 27                       | 654                        | 642                               | 123                               |
| 61 | cd568 | EXOC3         | 28                       | 750                        | 675                               | 147                               |
| 62 | cd570 | ALG2          | 27                       | 894                        | 894                               | 147                               |
| 63 | cd571 | TDP2          | 21                       | 237                        | 237                               | 147                               |
| 64 | cd599 | KCNK2         | 27                       | 309                        | 309                               | 180                               |
| 65 | cd604 | THADA         | 28                       | 660                        | 660                               | 123                               |
| 66 | cd608 | ABCC10        | 23                       | 237                        | 228                               | 117                               |
| 67 | cd609 | ABCC10        | 25                       | 480                        | 471                               | 114                               |
| 68 | cd616 | CEBPZ         | 28                       | 1122                       | 1119                              | 126                               |
| 69 | cd623 | NUP13         | 26                       | 222                        | 222                               | 120                               |
| 70 | cd624 | GPBR1         | 27                       | 933                        | 906                               | 126                               |
| 71 | cd627 | EPM2A         | 24                       | 240                        | 237                               | 120                               |
| 72 | cd636 | JMJD6         | 27                       | 387                        | 384                               | 201                               |
| 73 | cd655 | NSDHL         | 27                       | 318                        | 315                               | 120                               |
| 74 | cd660 | NUDT6         | 28                       | 345                        | 345                               | 135                               |
| 75 | cd676 | FRAS1         | 28                       | 345                        | 345                               | 126                               |
| 76 | cd677 | MOSPD1        | 25                       | 219                        | 216                               | 120                               |
| 77 | cd687 | ANKRD50       | 25                       | 456                        | 450                               | 120                               |
| 78 | cd693 | KIAA1239      | 28                       | 591                        | 591                               | 150                               |
| 79 | cd695 | FRAS1         | 25                       | 201                        | 201                               | 126                               |
| 80 | cd698 | PRDM8         | 26                       | 228                        | 228                               | 111                               |



|            | # CDS  | External name | # Sequences in alignment | Query Sequence Length (bp) | Max Sequence Length captured (bp) | Min Sequence Length captured (bp) |
|------------|--------|---------------|--------------------------|----------------------------|-----------------------------------|-----------------------------------|
| <b>81</b>  | cd699  | FGF5          | 28                       | 348                        | 348                               | 123                               |
| <b>82</b>  | cd714  | COPB1         | 25                       | 225                        | 225                               | 78                                |
| <b>83</b>  | cd722  | RAG2          | 28                       | 1419                       | 1407                              | 354                               |
| <b>84</b>  | cd725  | MYBPC3        | 27                       | 258                        | 258                               | 108                               |
| <b>85</b>  | cd727  | DNAH10        | 27                       | 420                        | 417                               | 144                               |
| <b>86</b>  | cd758  | PCNXL4        | 27                       | 690                        | 687                               | 291                               |
| <b>87</b>  | cd759  | LRRC9         | 24                       | 204                        | 204                               | 114                               |
| <b>88</b>  | cd774  | CDH23         | 13                       | 210                        | 204                               | 147                               |
| <b>89</b>  | cd805  | DST           | 23                       | 285                        | 285                               | 132                               |
| <b>90</b>  | cd807  | DTD1          | 28                       | 234                        | 234                               | 123                               |
| <b>91</b>  | cd814  | FBXL4         | 28                       | 498                        | 498                               | 129                               |
| <b>92</b>  | cd817  | RELN          | 26                       | 231                        | 228                               | 87                                |
| <b>93</b>  | cd834  | TTN           | 28                       | 300                        | 300                               | 105                               |
| <b>94</b>  | cd845  | RAB3GAP1      | 26                       | 225                        | 225                               | 105                               |
| <b>95</b>  | cd847  | WDSUB1        | 28                       | 387                        | 381                               | 132                               |
| <b>96</b>  | cd850  | PHKB          | 26                       | 195                        | 192                               | 114                               |
| <b>97</b>  | cd853  | TSHZ3         | 26                       | 255                        | 255                               | 126                               |
| <b>98</b>  | cd856  | TRIP4         | 26                       | 198                        | 198                               | 105                               |
| <b>99</b>  | cd880  | SELRC1        | 27                       | 399                        | 396                               | 126                               |
| <b>100</b> | cd888  | FUT10         | 28                       | 834                        | 834                               | 279                               |
| <b>101</b> | cd898  | HMCN1         | 26                       | 252                        | 249                               | 108                               |
| <b>102</b> | cd899  | TRMT1L        | 27                       | 300                        | 252                               | 150                               |
| <b>103</b> | cd905  | IKBKAP        | 25                       | 231                        | 228                               | 117                               |
| <b>104</b> | cd909  | TRPC1         | 27                       | 336                        | 336                               | 204                               |
| <b>105</b> | cd919  | GPR171        | 28                       | 870                        | 870                               | 177                               |
| <b>106</b> | cd927  | TTN           | 28                       | 273                        | 273                               | 126                               |
| <b>107</b> | cd932  | TSPEAR        | 27                       | 222                        | 222                               | 111                               |
| <b>108</b> | cd947  | FYN           | 27                       | 243                        | 243                               | 117                               |
| <b>109</b> | cd950  | GLCE          | 25                       | 231                        | 231                               | 129                               |
| <b>110</b> | cd953  | ABCB7         | 27                       | 210                        | 210                               | 90                                |
| <b>111</b> | cd960  | CCDC127       | 26                       | 636                        | 636                               | 126                               |
| <b>112</b> | cd963  | NYX           | 27                       | 915                        | 915                               | 270                               |
| <b>113</b> | cd971  | DHTKD1        | 24                       | 267                        | 267                               | 123                               |
| <b>114</b> | cd992  | PDPR          | 27                       | 399                        | 399                               | 126                               |
| <b>115</b> | cd998  | FOCAD         | 26                       | 234                        | 234                               | 117                               |
| <b>116</b> | cd1004 | PIGM          | 26                       | 255                        | 255                               | 105                               |
| <b>117</b> | cd1055 | AHI1          | 26                       | 186                        | 183                               | 120                               |
| <b>118</b> | cd1058 | TNKS          | 26                       | 237                        | 237                               | 57                                |
| <b>119</b> | cd1061 | DPYD          | 25                       | 213                        | 213                               | 123                               |
| <b>120</b> | cd1074 | SLC35D3       | 28                       | 435                        | 432                               | 114                               |
| <b>121</b> | cd1076 | TRAPPC12      | 26                       | 240                        | 240                               | 126                               |
| <b>122</b> | cd1078 | RECQL5        | 18                       | 468                        | 468                               | 174                               |

|     | # CDS  | External name | # Sequences in alignment | Query Sequence Length (bp) | Max Sequence Length captured (bp) | Min Sequence Length captured (bp) |
|-----|--------|---------------|--------------------------|----------------------------|-----------------------------------|-----------------------------------|
| 123 | cd1085 | SORL1         | 23                       | 243                        | 243                               | 171                               |
| 124 | cd1090 | AGRN          | 25                       | 213                        | 210                               | 120                               |
| 125 | cd1091 | SLC22A23      | 20                       | 291                        | 288                               | 135                               |
| 126 | cd1094 | RAI2          | 26                       | 315                        | 303                               | 192                               |
| 127 | cd1096 | CLIP4         | 23                       | 180                        | 174                               | 117                               |
| 128 | cd1099 | LRP2          | 27                       | 270                        | 270                               | 129                               |
| 129 | cd1108 | GPR75         | 28                       | 1503                       | 1209                              | 252                               |
| 130 | cd1110 | SWAP70        | 25                       | 225                        | 225                               | 117                               |
| 131 | cd1115 | TUBGCP5       | 26                       | 237                        | 234                               | 105                               |
| 132 | cd1123 | NRDE2         | 25                       | 312                        | 312                               | 123                               |
| 133 | cd1126 | OXSM          | 28                       | 855                        | 855                               | 219                               |
| 134 | cd1127 | RAD50         | 14                       | 195                        | 192                               | 117                               |
| 135 | cd1130 | CCDC51        | 27                       | 297                        | 297                               | 84                                |
| 136 | cd1133 | ZNF598        | 26                       | 219                        | 219                               | 123                               |
| 137 | cd1134 | ASCC3         | 25                       | 222                        | 222                               | 57                                |
| 138 | cd1145 | HEPACAM       | 26                       | 330                        | 330                               | 126                               |
| 139 | cd1150 | HSPG2         | 25                       | 264                        | 264                               | 105                               |
| 140 | cd1161 | DNAH7         | 26                       | 327                        | 327                               | 111                               |
| 141 | cd1171 | DNAH5         | 27                       | 321                        | 318                               | 159                               |
| 142 | cd1175 | SLC35F6       | 28                       | 372                        | 372                               | 123                               |
| 143 | cd1180 | PID1          | 28                       | 465                        | 456                               | 162                               |
| 144 | cd1195 | EFHB          | 20                       | 210                        | 210                               | 135                               |
| 145 | cd1201 | VASH1         | 27                       | 309                        | 306                               | 165                               |
| 146 | cd1207 | KIAA1239      | 28                       | 585                        | 585                               | 123                               |
| 147 | cd1217 | ZFPM2         | 28                       | 2142                       | 1797                              | 411                               |
| 148 | cd1234 | SLC20A2       | 27                       | 561                        | 558                               | 144                               |
| 149 | cd1239 | USP19         | 25                       | 207                        | 207                               | 126                               |
| 150 | cd1257 | C8B           | 17                       | 174                        | 171                               | 117                               |
| 151 | cd1258 | KCTD4         | 28                       | 726                        | 726                               | 123                               |
| 152 | cd1272 | SRBD1         | 28                       | 282                        | 282                               | 114                               |
| 153 | cd1279 | MED23         | 28                       | 246                        | 246                               | 114                               |
| 154 | cd1299 | PDGFRL        | 27                       | 234                        | 231                               | 120                               |
| 155 | cd1338 | NBAS          | 23                       | 228                        | 228                               | 117                               |
| 156 | cd1349 | KLHL38        | 24                       | 270                        | 270                               | 105                               |
| 157 | cd1351 | KL            | 28                       | 1116                       | 1113                              | 102                               |
| 158 | cd1352 | KL            | 27                       | 384                        | 381                               | 153                               |
| 159 | cd1354 | VPS13C        | 21                       | 387                        | 387                               | 90                                |
| 160 | cd1360 | CPOX          | 22                       | 216                        | 216                               | 111                               |
| 161 | cd1368 | AIFM2         | 22                       | 183                        | 180                               | 90                                |
| 162 | cd1371 | KIAA1109      | 24                       | 210                        | 210                               | 117                               |
| 163 | cd1374 | SLC30A5       | 28                       | 297                        | 282                               | 123                               |
| 164 | cd1379 | LRIT3         | 23                       | 255                        | 255                               | 120                               |

|            | # CDS  | External name | # Sequences in alignment | Query Sequence Length (bp) | Max Sequence Length captured (bp) | Min Sequence Length captured (bp) |
|------------|--------|---------------|--------------------------|----------------------------|-----------------------------------|-----------------------------------|
| <b>165</b> | cd1385 | RAB30         | 26                       | 237                        | 237                               | 126                               |
| <b>166</b> | cd1391 | RGS9BP        | 28                       | 543                        | 543                               | 264                               |
| <b>167</b> | cd1396 | UBIAD1        | 21                       | 411                        | 408                               | 78                                |
| <b>168</b> | cd1405 | EOMES         | 28                       | 582                        | 561                               | 171                               |
| <b>169</b> | cd1428 | NARS          | 23                       | 219                        | 219                               | 75                                |
| <b>170</b> | cd1429 | DMRT3         | 28                       | 837                        | 837                               | 291                               |
| <b>171</b> | cd1431 | DAPK1         | 28                       | 1518                       | 1233                              | 351                               |
| <b>172</b> | cd1438 | GPR98         | 28                       | 474                        | 375                               | 141                               |

Table S3B: data missing per taxon in relation to the query sequence.

| Genus                              | Species              | Sequence length of concatenated 172 loci (linear unaligned, basepairs) | missing data |
|------------------------------------|----------------------|------------------------------------------------------------------------|--------------|
| <b>Query: <i>Callorhinchus</i></b> | <i>mili</i>          | 71,234                                                                 | 0,00%        |
| <i>Squalus</i>                     | <i>acanthias</i>     | 55,503                                                                 | 22,08%       |
| <i>Cirrhigaleus</i>                | <i>asper</i>         | 62,768                                                                 | 11,88%       |
| <i>Centrophorus</i>                | <i>moluccensis</i>   | 48,343                                                                 | 32,13%       |
| <i>Deania</i>                      | sp.                  | 22,732                                                                 | 68,09%       |
| <i>Dalatias</i>                    | <i>licha</i>         | 45,206                                                                 | 36,54%       |
| <i>Isistius</i>                    | <i>brasiliensis</i>  | 42,563                                                                 | 40,25%       |
| <i>Squaliolus</i>                  | <i>aliae</i>         | 51,961                                                                 | 27,06%       |
| <i>Euprotomicrus</i>               | <i>bispinatus</i>    | 56,696                                                                 | 20,41%       |
| <i>Somniosus</i>                   | <i>microcephalus</i> | 44,741                                                                 | 37,19%       |
| <i>Zameus</i>                      | <i>squamulosus</i>   | 49,333                                                                 | 30,75%       |
| <i>Scymnodon</i>                   | <i>ringens</i>       | 43,818                                                                 | 38,49%       |
| <i>Centroselachus</i>              | <i>crepidater</i>    | 46,804                                                                 | 34,30%       |
| <i>Centroscymnus</i>               | <i>coelolepis</i>    | 52,123                                                                 | 26,83%       |

|                       |                      |        |        |
|-----------------------|----------------------|--------|--------|
| <i>Scymnodon</i>      | <i>plunketi</i>      | 50,336 | 29,34% |
| <i>Oxynotus</i>       | <i>paradoxus</i>     | 49,411 | 30,64% |
| <i>Aculeola</i>       | <i>nigra</i>         | 51,910 | 27,13% |
| <i>Centroscyllium</i> | <i>fabricii</i>      | 59,249 | 16,82% |
| <i>Etmopterus</i>     | <i>splendidus</i>    | 48,886 | 31,37% |
| <i>Etmopterus</i>     | <i>sheikoi</i>       | 64,262 | 9,79%  |
| <i>Etmopterus</i>     | cf. <i>molleri</i>   | 57,800 | 18,86% |
| <i>Etmopterus</i>     | <i>spinax</i>        | 50,153 | 29,59% |
| <i>Etmopterus</i>     | <i>gracilispinis</i> | 49,907 | 29,94% |
| <i>Trigonognathus</i> | <i>kabeyai</i>       | 61,048 | 14,30% |
| <i>Echinorhinus</i>   | <i>brucus</i>        | 40,248 | 43,50% |
| <i>Pliotrema</i>      | <i>warreni</i>       | 58,028 | 18,54% |
| <i>Pristiophorus</i>  | <i>japonicus</i>     | 56,426 | 20,79% |
| <i>Squatina</i>       | <i>nebulosa</i>      | 55,156 | 22,57% |
| <i>Hexanchus</i>      | <i>griseus</i>       | 51,674 | 27,46% |

Table S4: Overview of different phylogenetic analyses performed on the concatenated 172 loci dataset

| <b>Dataset</b>                                 | <b>Method</b>      | <b>Tool</b> | <b>Substitution Model</b> | <b>Partition scheme</b>                                                | <b>Outgroup</b>                                                      |
|------------------------------------------------|--------------------|-------------|---------------------------|------------------------------------------------------------------------|----------------------------------------------------------------------|
| <b>Concatenated 1265 cds nucleotide loci</b>   | Maximum likelihood | RAxML       | GTRCAT                    | none                                                                   | <i>Hexanchus griseus</i>                                             |
| <b>Concatenated 1265 cds nucleotide loci</b>   | Maximum likelihood | RAxML       | GTR+G                     | 1 <sup>st</sup> +2 <sup>nd</sup> & 3 <sup>rd</sup> codon               | <i>Hexanchus griseus</i>                                             |
| <b>Concatenated 1265 cds nucleotide loci</b>   | Maximum likelihood | RAxML       | GTR+G                     | By gene                                                                | <i>Hexanchus griseus</i>                                             |
| <b>MARE reduced 174 loci amino acid matrix</b> | Maximum likelihood | RAxML       | JTT+G                     | By gene                                                                | <i>Hexanchus griseus</i>                                             |
| <b>MARE reduced 174 loci amino acid matrix</b> | Maximum likelihood | RAxML       | Blosum62                  | By gene                                                                | <i>Hexanchus griseus</i>                                             |
| <b>MARE reduced 174 loci amino acid matrix</b> | Maximum likelihood | RAxML       | see partition file*       | Best partition scheme suggested by partitionfinderProtein vers. 1.1.1* | <i>Hexanchus griseus</i>                                             |
| <b>Concatenated 172 cds nucleotide loci</b>    | Maximum likelihood | RAxML       | GTRCAT                    | none                                                                   | <i>Hexanchus griseus</i>                                             |
| <b>Concatenated 172 cds nucleotide loci</b>    | Maximum likelihood | RAxML       | GTR+G                     | 1 <sup>st</sup> +2 <sup>nd</sup> & 3 <sup>rd</sup> codon               | <i>no outgroup defined</i>                                           |
| <b>Concatenated 172 cds nucleotide loci</b>    | Maximum likelihood | RAxML       | GTR+G                     | by gene and 1 <sup>st</sup> +2 <sup>nd</sup> & 3 <sup>rd</sup> codon   | <i>Hexanchus griseus</i>                                             |
| <b>Concatenated 172 cds nucleotide loci</b>    | Maximum likelihood | RAxML       | see partition file**      | Best partition scheme suggested by partitionfinder vers. 1.1.1**       | <i>Hexanchus griseus</i>                                             |
| <b>Concatenated 172 cds nucleotide loci</b>    | Maximum likelihood | RAxML       | GTRCAT                    | none                                                                   | <i>no outgroup defined</i>                                           |
| <b>Concatenated 172 cds nucleotide loci</b>    | Maximum likelihood | RAxML       | GTRCAT                    | none                                                                   | <i>no outgroup defined, Hexanchus griseus deleted from alignment</i> |
| <b>Concatenated 172 amino acid loci</b>        | Bayesian           | PhyloBayes  | CAT                       | none                                                                   | <i>n.a.</i>                                                          |
| <b>Concatenated 172 cds nucleotide loci</b>    | Bayesian inference | BEAST       | GTR+G                     | 1 <sup>st</sup> +2 <sup>nd</sup> & 3 <sup>rd</sup> codon               | <i>Hexanchus griseus</i>                                             |

\*PartitionfinderProtein best partitioning scheme for RAxML:

```

branchlengths : linked
models : MTMAM+G+F, MTMAM+G, DAYHOFF+G, DCMUT+G+F, VT+G+F, DCMUT+G, JTT+G, LG+G+F, LG+G, MTREV+G,
MTREV+G+F, RTREV+G+F, WAG+G, CPREV+G, CPREV+G+F, WAG+G+F, JTT+G+F, DAYHOFF+G+F, RTREV+G, VT+G, BLOSUM62+G,
BLOSUM62+G+F
model_selection : bic
search : rcluster
weights : rate = 1, base = 0, model = 0, alpha = 0
rcluster-percent : 1.0

JTT, p1 = 1-285, 1188-1477, 2030-2206, 2803-3004, 3521-3606, 5044-5593, 6280-6495, 8078-8206, 11480-11556, 11997-12071, 12072-12195, 12818-
12898, 13178-13335, 15183-15256, 16167-16538, 16618-16726, 16727-16965, 17816-17930, 19078-19169, 20052-20135, 20743-20813, 20888-21129,
21744-21811, 22612-22748, 22749-22877, 23174-23254, 24016-24095, 24096-24166
JTT, p2 = 286-381, 382-686, 3170-3248, 6210-6279, 13336-13457
JTT, p3 = 687-1187, 11871-11996
JTT, p4 = 1478-1661
JTT, p5 = 1662-1756, 1869-2029, 3249-3338, 13701-13840, 23662-23740
JTT, p6 = 1757-1868, 14491-14685, 15969-16041, 18332-18404, 19423-19499, 21517-21743, 22401-22499, 22500-22611
JTT, p7 = 2207-2436, 6103-6209, 7642-7793, 8207-8920, 10152-10279, 11713-11797, 11798-11870, 18466-18535, 19170-19234, 19828-19902, 20269-
20413, 21423-21516
MTMAM, p8 = 2437-2536
JTT, p9 = 2537-2733, 4119-4416, 7300-7388, 13458-13527
JTT, p10 = 2734-2802, 10535-10638, 11625-11712
JTT, p11 = 3005-3095
JTT, p12 = 3096-3169, 3607-3826, 8001-8077, 9837-9913, 10435-10534, 11353-11479, 15423-15501, 15903-15968, 21130-21219
JTT, p13 = 3339-3520
JTT, p14 = 3827-3901
JTT, p15 = 3902-3967, 10280-10365, 20511-20742, 23417-23506
JTT, p16 = 3968-4118, 11267-11352, 12662-12817, 17931-18142
JTT, p17 = 4417-4496, 6035-6102, 12984-13177, 14058-14182, 16539-16617, 18227-18331, 19308-19422, 23255-23336, 23337-23416
JTT, p18 = 4497-4566, 11557-11624, 14260-14365, 14964-15037, 15257-15422, 16042-16166, 18143-18226, 21883-22159, 22291-22400, 23032-23097
JTT, p19 = 4567-4784, 14366-14428
JTT, p20 = 4785-4883, 5594-5967, 10082-10151, 12899-12983, 13528-13700, 14429-14490, 15111-15182

```

JTT, p21 = 4884-5043  
 JTT, p22 = 5968-6034, 7794-8000, 9979-10081, 16966-17471, 18612-18890, 18891-19077, 19750-19827, 19903-19978, 20414-20510, 20814-20887, 22218-22290, 23741-23937, 23938-24015  
 JTT, p23 = 6496-6971, 6972-7112, 8921-9053, 9914-9978, 12351-12661, 13841-13914, 14686-14963, 17640-17755, 17756-17815, 21320-21422, 22878-22952  
 JTT, p24 = 7113-7299, 9054-9131, 13990-14057, 18536-18611, 21220-21319  
 JTT, p25 = 7389-7483, 9132-9260, 9261-9836, 17472-17639, 19235-19307, 19500-19749, 20136-20268, 23507-23661, 24167-24235, 24236-24461  
 JTT, p26 = 7484-7641, 10726-11198  
 JTT, p27 = 10366-10434  
 JTT, p28 = 10639-10725, 14183-14259, 15038-15110, 23098-23173  
 JTT, p29 = 11199-11266, 12281-12350, 22160-22217  
 MTMAM, p30 = 12196-12280  
 JTT, p31 = 13915-13989, 15502-15902  
 JTT, p32 = 18405-18465  
 JTT, p33 = 19979-20051  
 MTREV, p34 = 21812-21882  
 JTT, p35 = 22953-23031

\*\*Partitionfinder best partitioning scheme for RAxML:

branchlengths : linked  
 models : GTR+I+G, GTR+G  
 model\_selection : bic  
 search : rcluster  
 weights : rate = 1, base = 0, model = 0, alpha = 0  
 rcluster-percent : 0.1

DNA, p1 = 1-453, 6391-6612, 9164-9541, 32430-32669, 32670-33056, 43575-43826, 51471-51683, 51684-51974, 56583-56804, 56805-57134  
 DNA, p2 = 454-1881, 2563-2751, 3919-4170, 4603-4815, 5026-5508, 5740-5967, 5968-6390, 6913-7116, 7117-7320, 7525-7749, 8008-8265, 10595-11185, 11186-11560, 11768-12043, 12263-12466, 12674-13204, 13205-14407, 15935-16495, 16496-17116, 17621-19270, 19271-19876, 21368-21565, 21566-22111, 22112-22396, 22667-22897, 23264-23644, 25613-25931, 26586-27335, 27336-28229, 28230-28466, 28776-29435, 30153-31274, 31275-31496, 33057-33374, 33375-33719, 33720-34064, 34065-34283, 34284-34739, 34740-35330, 35331-35531, 35760-36107, 36333-37751, 38430-39119, 39324-39533, 39819-40052, 40782-41081, 41082-41306, 41694-41888, 41889-42143, 42144-42341, 42342-42740, 42741-43574, 43827-44126, 44127-44357, 44358-44693, 44694-45563,

45837-46058, 46302-46532, 46533-46742, 46743-47378, 48960-49193, 49194-49448, 49449-49634, 49635-49871, 49872-50084, 50085-50519, 50520-50759, 52290-52469, 52470-52739, 54468-54704, 55017-55871, 55872-56066, 56067-56363, 56364-56582, 57726-58046, 58419-58883, 59094-59402, 59403-59987, 59988-62129, 62691-62897, 62898-63071, 63072-63797, 63798-64079, 64326-64559, 64560-64787, 64788-65057, 65058-66173, 66174-66557, 66945-67160, 67161-67343, 67344-67553, 67554-67850, 67851-68105, 69297-69878, 72453-72926  
DNA, p3 = 1882-2562, 4171-4392, 4393-4602, 4816-5025, 5509-5739, 6613-6912, 8266-8463, 8464-8689, 8690-9163, 9542-10219, 11561-11767, 12467-12673, 14408-15103, 19877-20593, 20594-20929, 21149-21367, 22397-22666, 22898-23263, 23645-25372, 25373-25612, 25932-26585, 29436-29672, 29673-30152, 31497-32429, 36108-36332, 37752-38009, 38010-38429, 39534-39818, 40053-40550, 45564-45836, 46059-46301, 47379-48293, 48294-48560, 48561-48959, 50760-51227, 51228-51470, 54243-54467, 54705-55016, 57135-57398, 57399-57725, 58047-58418, 58884-59093, 62130-62690, 64080-64325, 66558-66944, 68886-69296  
DNA, p4 = 2752-3399, 3400-3918, 7750-8007, 20930-21148, 52740-54242  
DNA, p5 = 7321-7524, 10220-10594, 12044-12262, 15104-15934, 17117-17620, 28467-28775, 35532-35759, 39120-39323, 40551-40781, 41307-41693, 51975-52289, 68106-68342, 69879-70097, 70098-70934, 70935-72452  
DNA, p6 = 68343-68885



Outgroup testing

For testing the influence of different outgroups, we compared unrooted topologies (Maximum Likelihood, computed with RAxML under GTRCAT).

a)

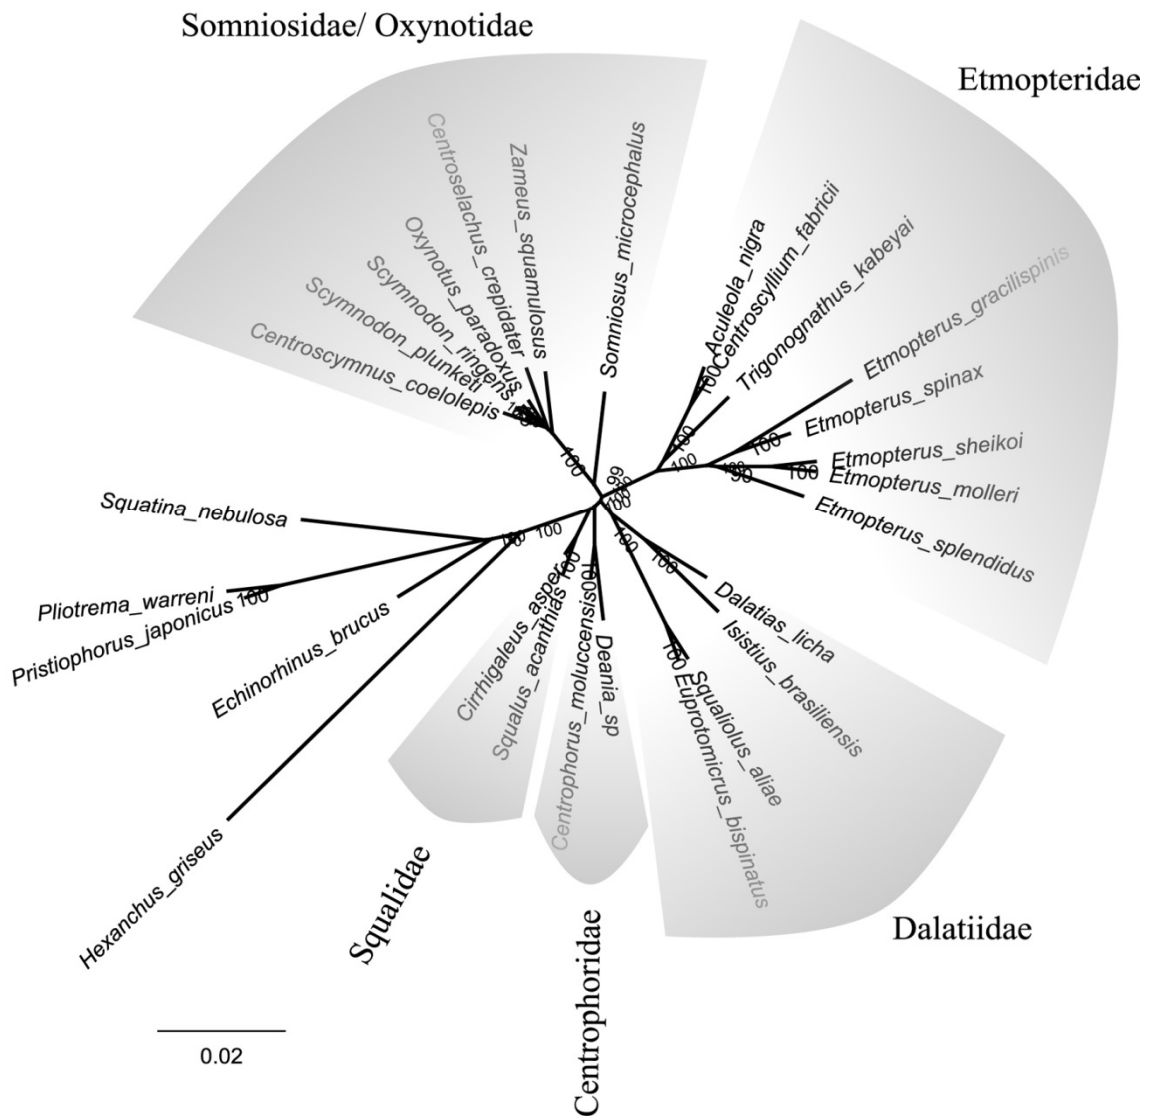

b)

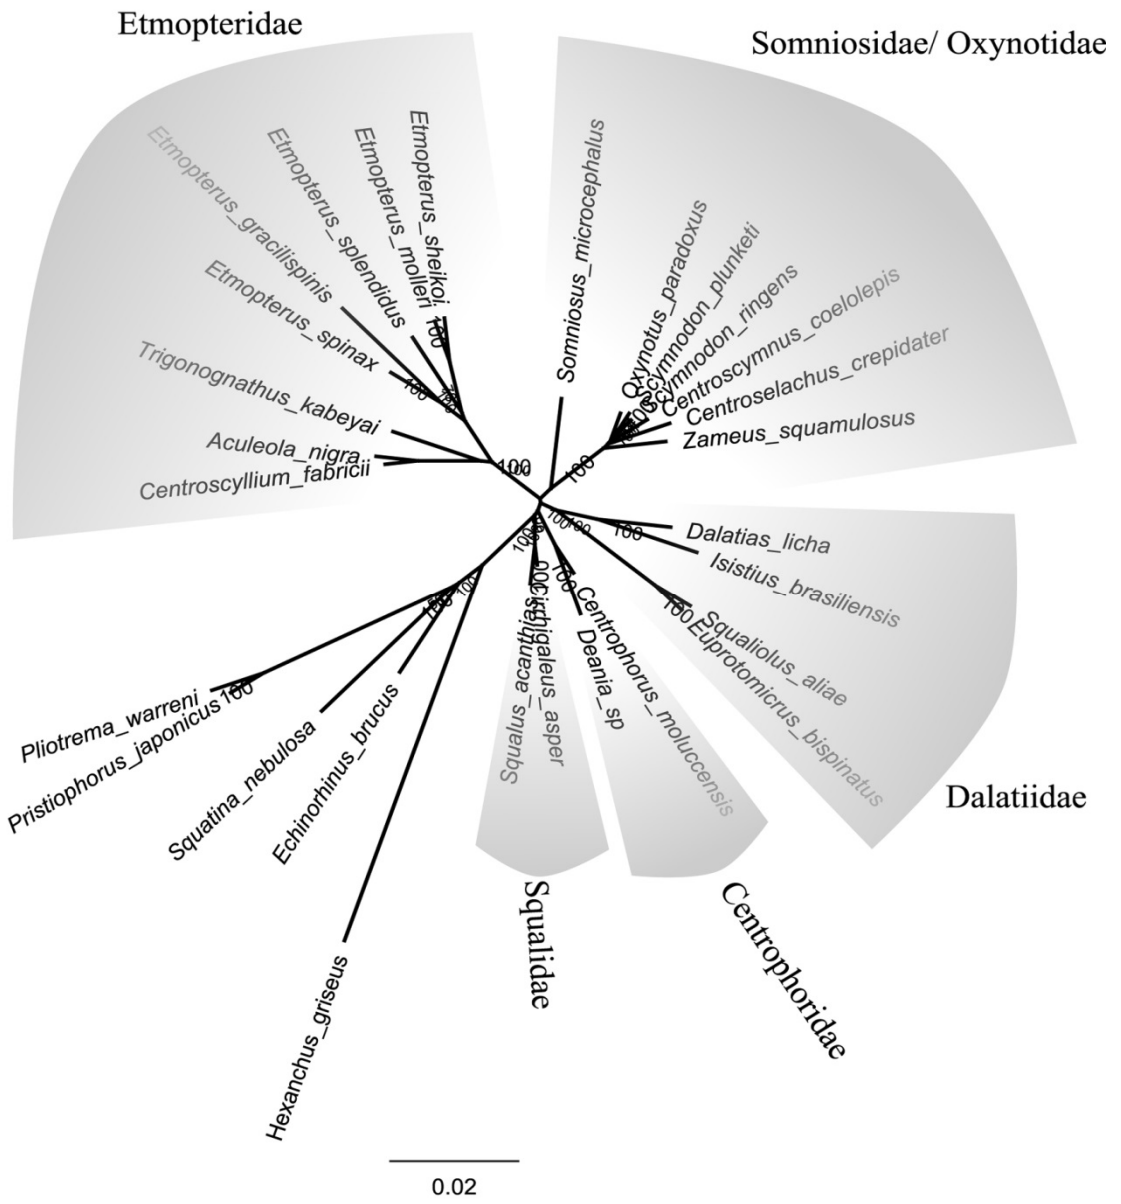

c)

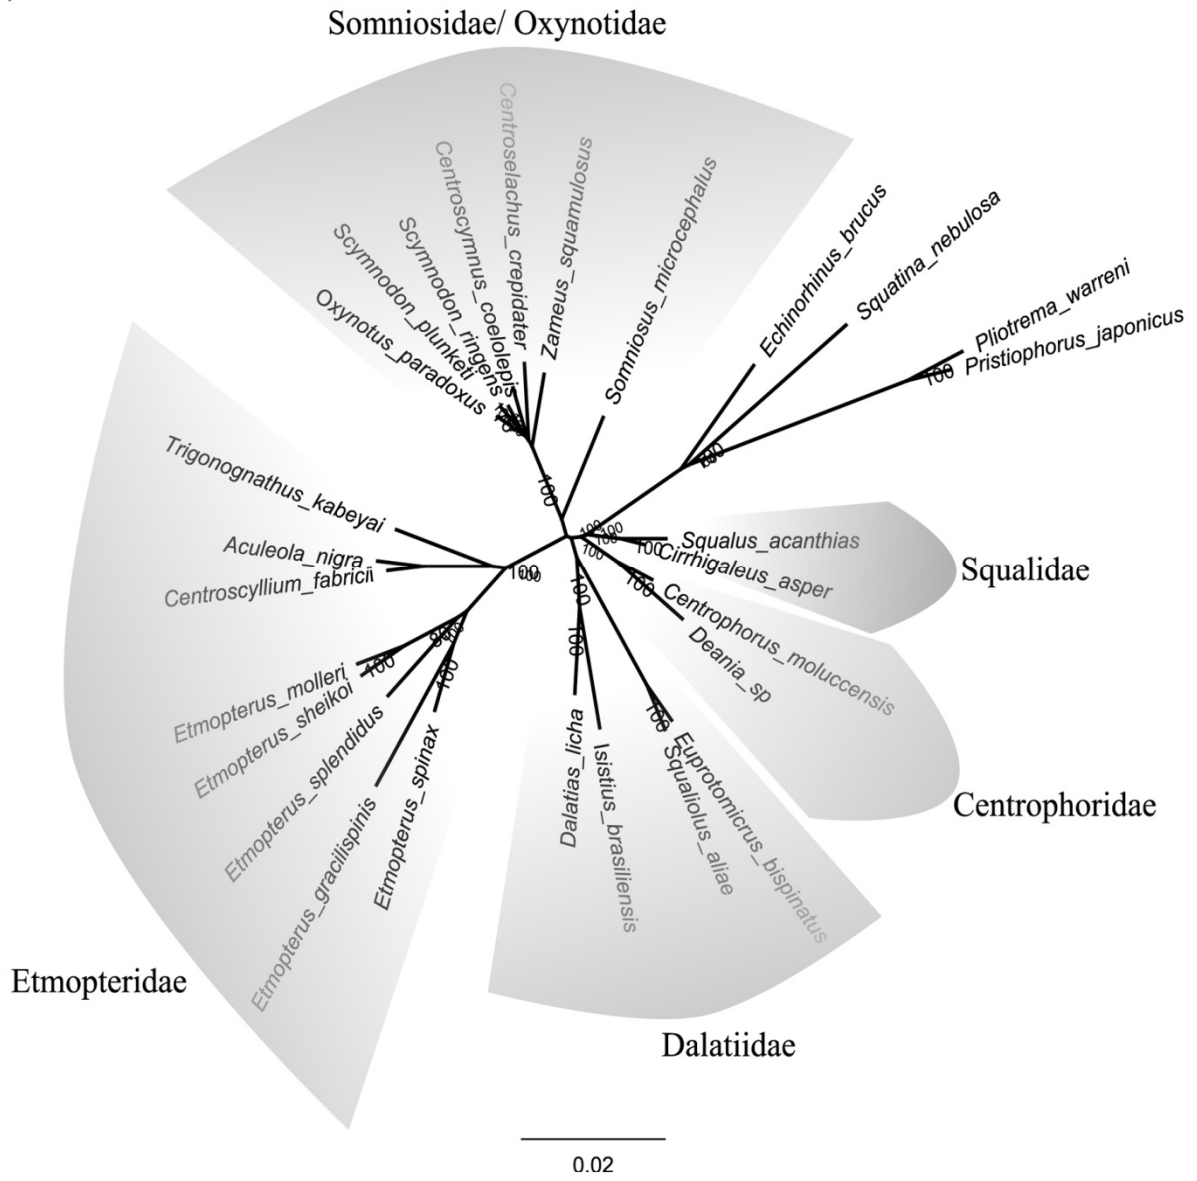

d)

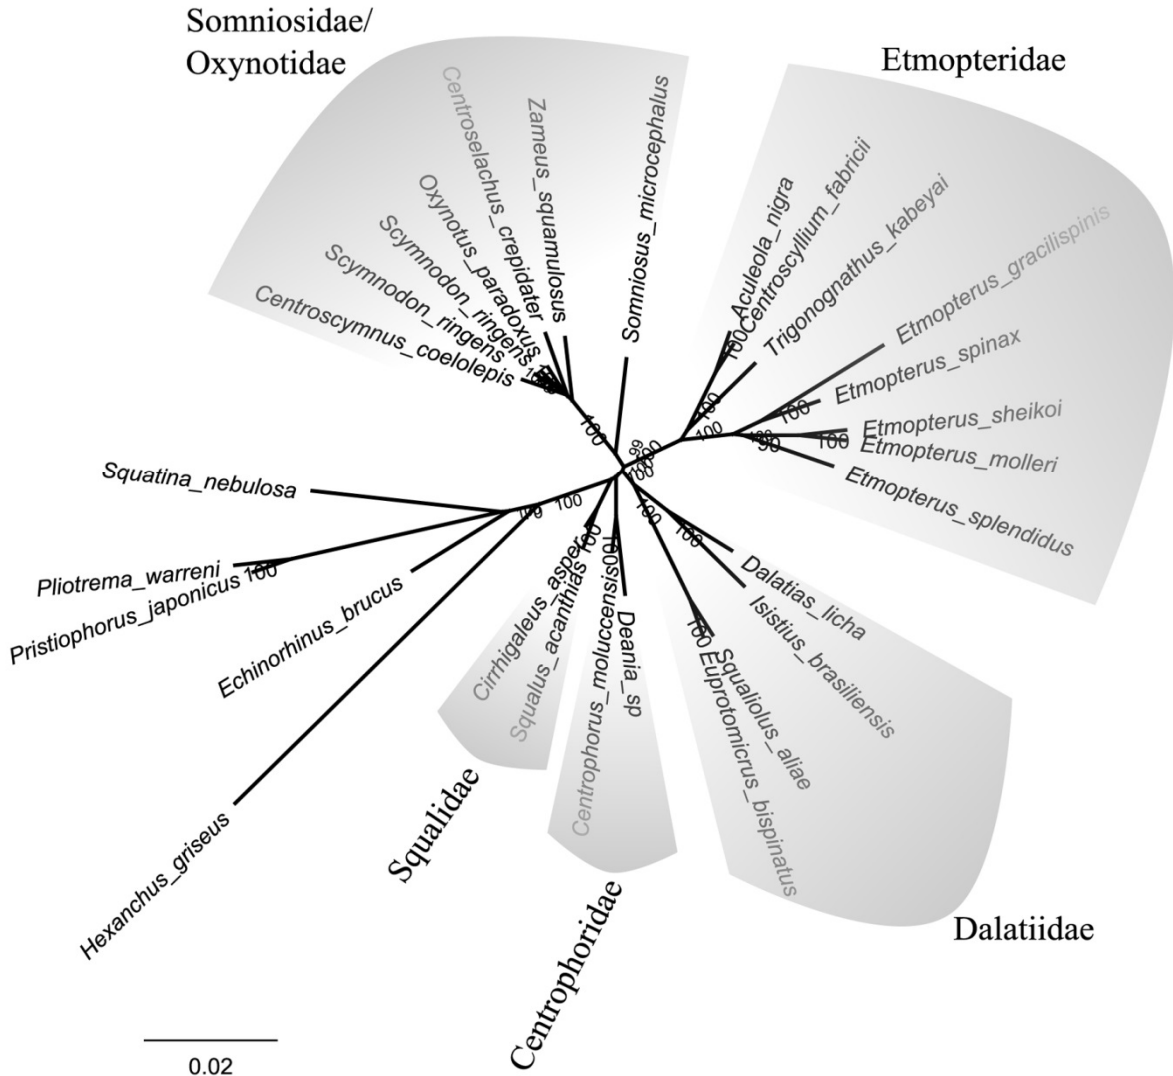

**Figure S2:** Maximum likelihood analyses comparing based on 172 nucleotide loci. Tree computed using RAxML [35] under GTRCAT.

- a) *Hexanchus griseus* chosen as outgroup.
- b) no outgroup defined
- c) excluding *Hexanchus griseus* from the analysis, no outgroup defined
- d) defining *Pristiophorus japonicus* and *Pliotrema warreni* as outgroup taxa.

Phylogenetic analysis:

Resulting phylogenetic estimates from analyses described in Table S4:

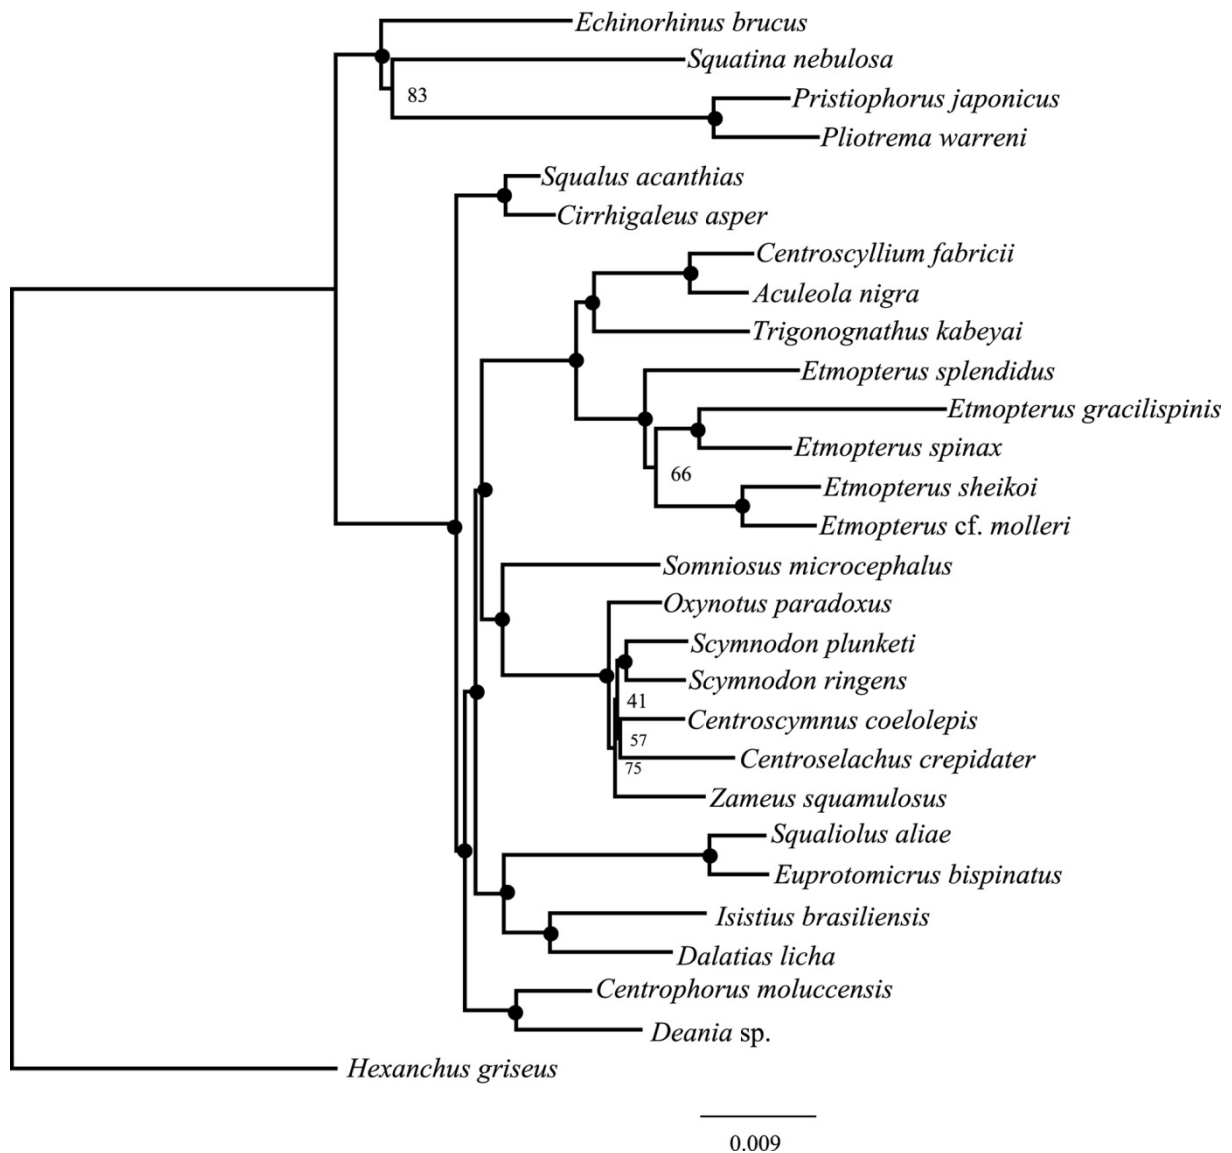

**Figure S3:** Maximum likelihood analysis using RAxML [35] under a GTRGAMMA model based on the full nucleotide dataset of 1265 loci including all sequence information. Data partitioned by 1st, 2nd and 3rd codon position. Black dots indicate 100% bootstrap support from 100 bootstrap replicates drawn. *Hexanchus griseus* was defined as outgroup.

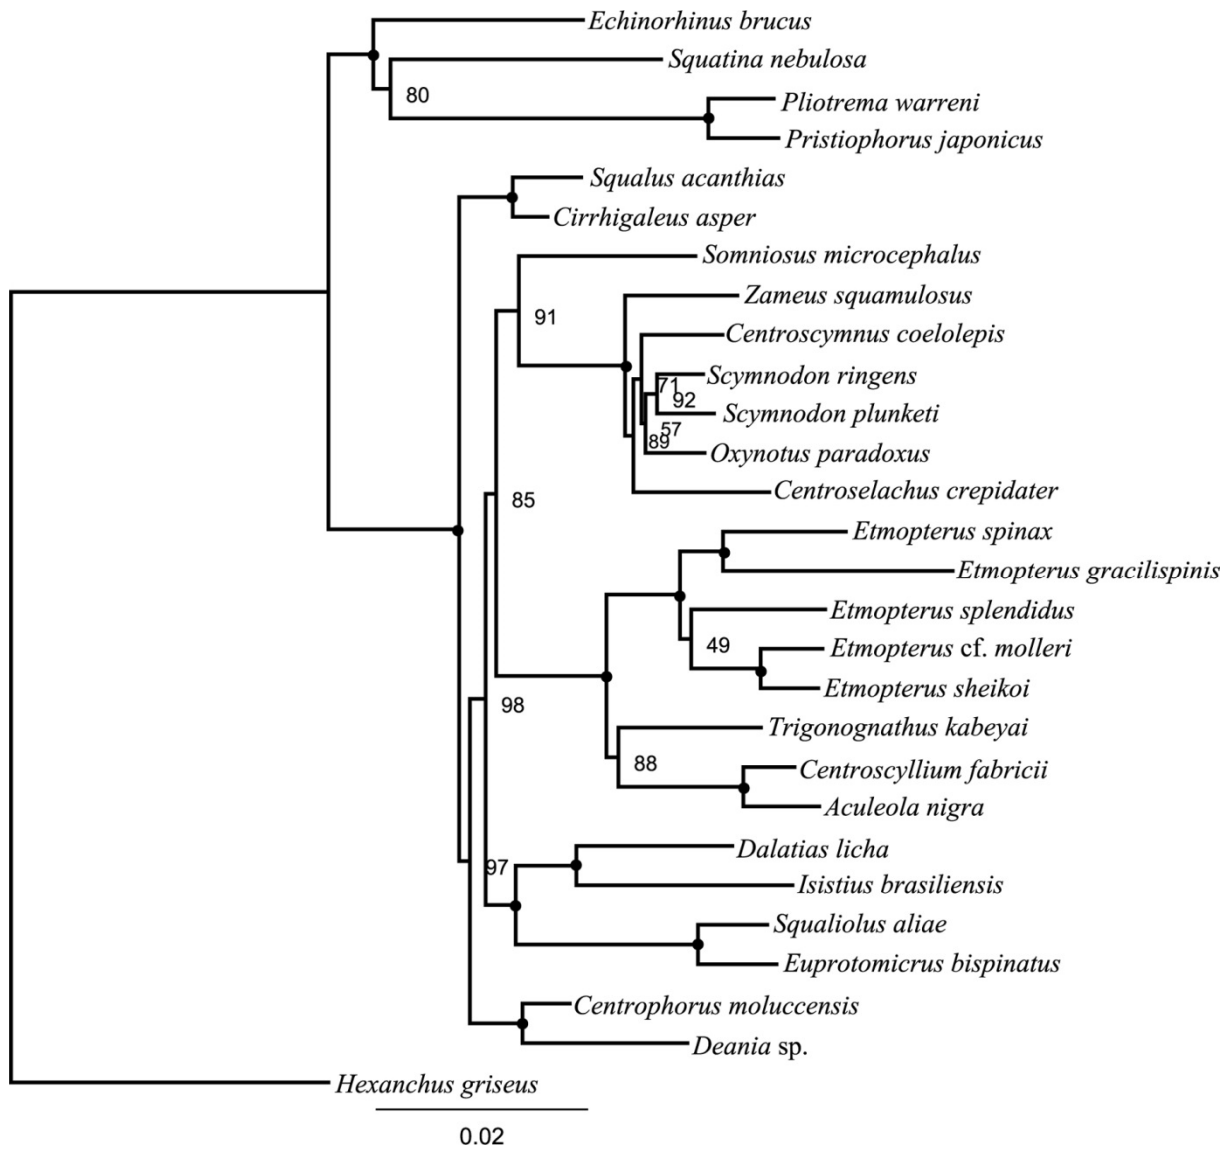

**Figure S4:** Maximum likelihood analysis using RAxML [35] based on the 174 loci translated to amino acids resulting from the MARE [33, 34] analysis. Data partition and model applications are based on the result of Partitionfinder Protein [62, 63] applied to the data before the ML analysis (see Table 3 for details on the partitioning scheme). Black dots indicate 100% bootstrap support from 100 bootstrap replicates drawn. *Hexanchus griseus* was defined as outgroup.

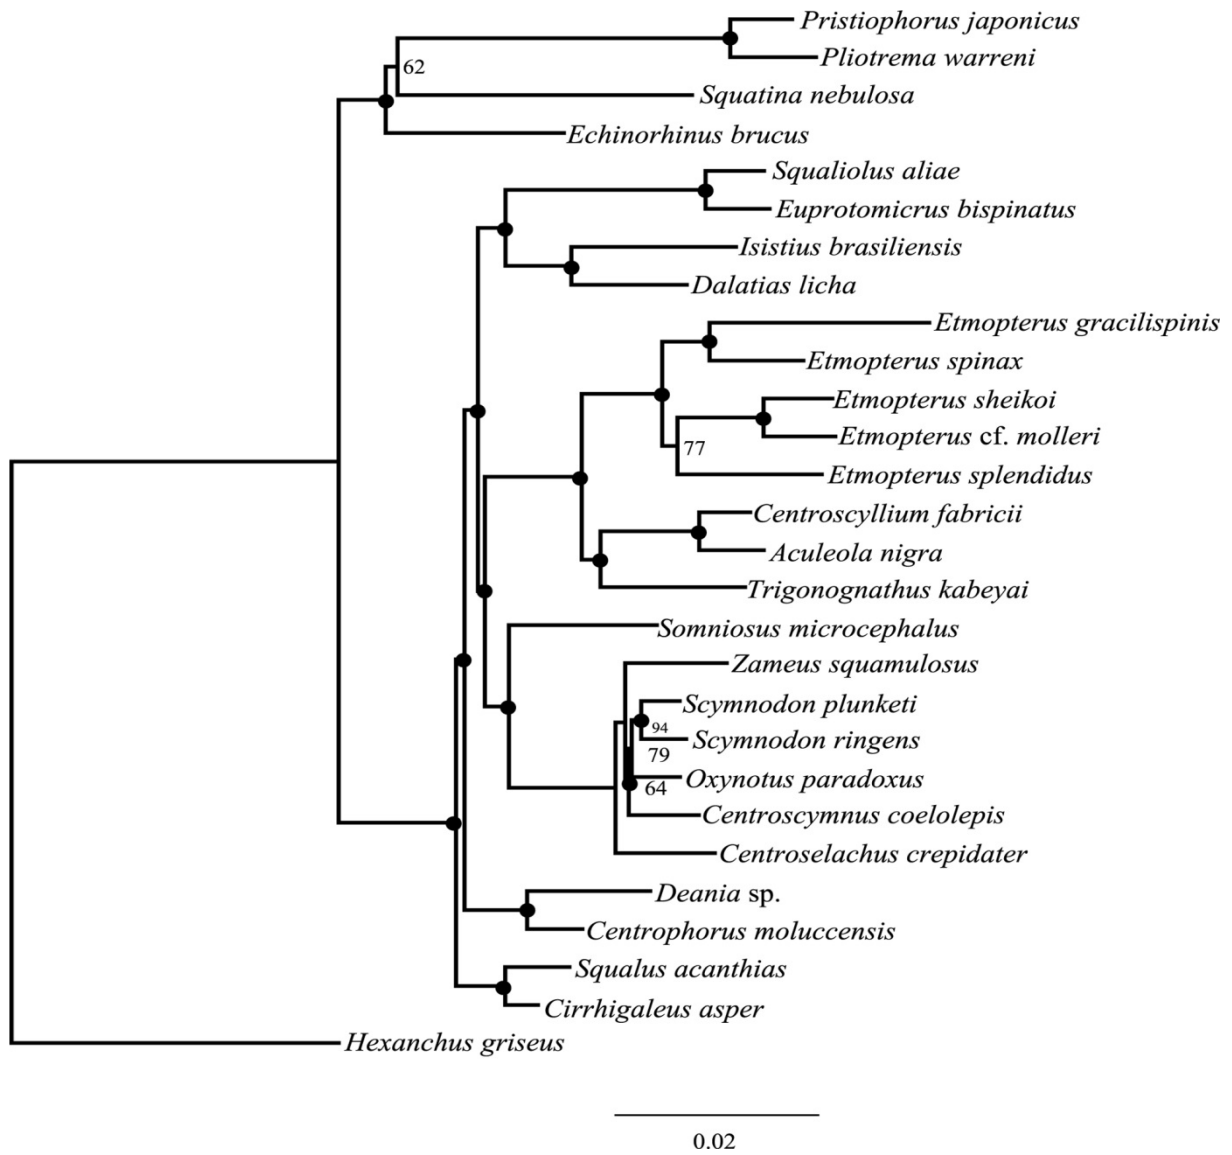

Figure S5: Maximum likelihood analysis using RAxML [35] based on the 172 loci translated to nucleotides resulting from the MARE [33, 34] and re-blast analysis. The data partition is based on the result of Partitionfinder [62, 63] applied to the data (see Table S4 for details on the partitioning scheme). Black dots indicate 100% bootstrap support from 100 bootstrap replicates drawn. *Hexanchus griseus* was defined as outgroup.

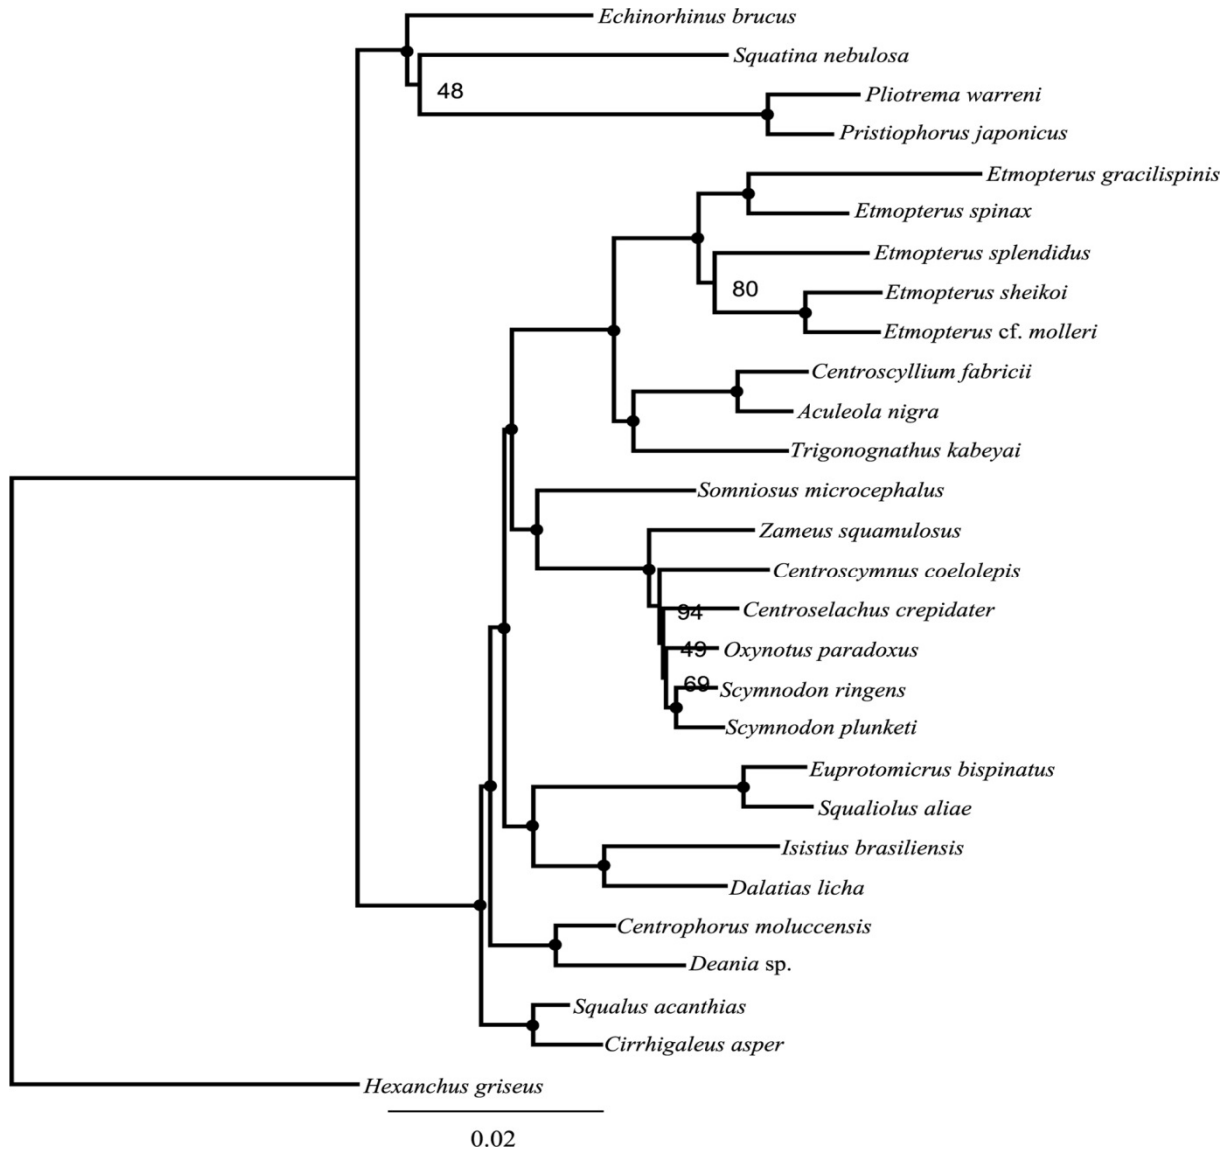

Figure S6: Maximum likelihood analysis using RAxML [35] based on the 172 loci translated to nucleotides resulting from the MARE and re-blast analysis. GTR GAMMA is used on unpartitioned data. Black dots indicate 100% bootstrap support from 100 bootstrap replicates drawn. *Hexanchus griseus* was defined as outgroup.



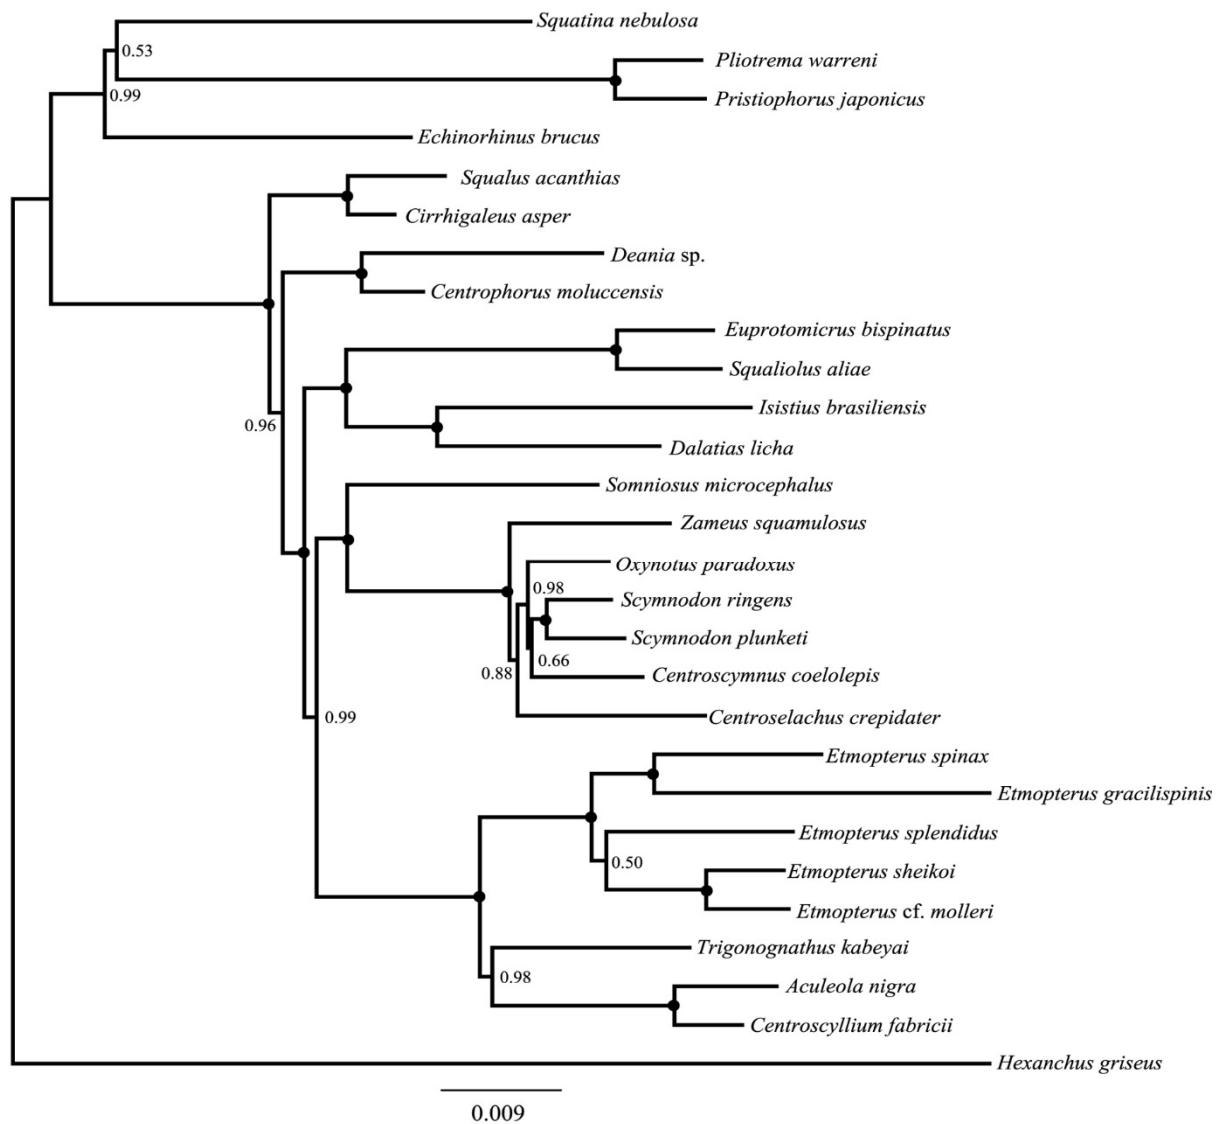

**Figure S7:** Bayesian inference using PhyloBayes 3.3f [36, 37] based on the 172 amino acid loci resulting from the MARE and re-blast analysis. The CAT model [64] is used on the unpartitioned dataset. Four chains were run in parallel. The tracefiles and treelists of all four chains were used to check for convergence. The analysis was stopped with a maximum difference of 0.16 and effective sample sizes exceeding 100, with the exception of the allocent statistic (see analysis protocol below). A majority rule consensus tree was computed from 12997 input trees from each chain (burnin = 1000 trees, analyzing every second tree of the pooled trees). Black dots indicate posterior probabilities of 1. Tree midpoint-rooted using Figtree 1.4.2 [69].

**Analysis protocol for the Bayesian inference using Phylobayes 3.3f [36, 37]:**

Phylobayes was called as follows:

```
pb -d "input alignmnet of 172 aminoacid loci" -cat -nchain 4 500 0.1 100.
```

tracecomp output after 4734362 generations:

| name | effsize | rel_diff |
|------|---------|----------|
|------|---------|----------|

|           |       |           |
|-----------|-------|-----------|
| loglik    | 448   | 0.139033  |
| length    | 3877  | 0.0473159 |
| alpha     | 831   | 0.106427  |
| nocc      | 410   | 0.163083  |
| stat      | 457   | 0.111566  |
| statalpha | 19448 | 0.026536  |
| kappa     | 881   | 0.103027  |
| allocent  | 52    | 0.499115  |

bpcomp output after 4734362 generations:

maxdiff: 0.157806

meandiff: 0.00259295

Plot of log-likelihoods for 4734362 generations:

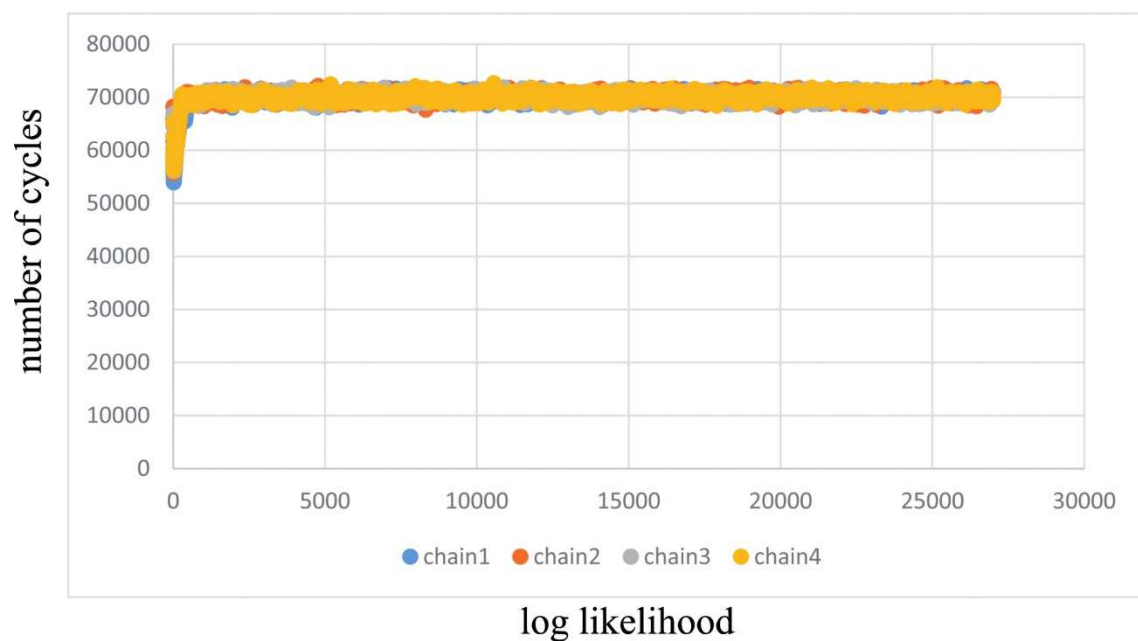

#### Node time estimation using BEAST

BEAUTi was used to create XML formatted input files for BEAST. Please see Table 2 in the main text for calibration points used. The full XML input file is available at

<http://datadryad.org/review?doi=doi:10.5061/dryad.n3581>

MEDUSA [42, 43] analysis for estimating diversification rates and shifts

Table S5: species richness table

| <b>taxon</b>                          | <b>Species richness values<br/>(deployed from [1])</b> |
|---------------------------------------|--------------------------------------------------------|
| <i>Aculeola</i>                       | 1                                                      |
| <i>Centrophorus</i>                   | 12                                                     |
| <i>Centroselachus</i>                 | 1                                                      |
| <i>Centroscyllium</i>                 | 7                                                      |
| <i>Centroscymnus</i>                  | 3                                                      |
| <i>Cirrhigaleus</i>                   | 3                                                      |
| <i>Dalatias</i>                       | 1                                                      |
| <i>Deania</i>                         | 4                                                      |
| <i>Echinorhinus</i>                   | 2                                                      |
| <i>Etmopterus lucifer</i> clade       | 11                                                     |
| <i>Etmopterus gracilispinis</i> clade | 7                                                      |
| <i>Etmopterus sheikoi</i>             | 1                                                      |
| <i>Etmopterus spinax</i> clade        | 10                                                     |
| <i>Etmopterus pusillus</i> clade      | 8                                                      |
| <i>Euprotomicrus</i>                  | 1                                                      |
| <i>Hexanchus</i>                      | 2                                                      |
| <i>Isistius</i>                       | 2                                                      |
| <i>Oxynotus</i>                       | 5                                                      |
| <i>Pliotrema</i>                      | 1                                                      |
| <i>Pristiophorus</i>                  | 7                                                      |
| <i>Scymnodon plunketi</i>             | 1                                                      |
| <i>Scymnodon</i>                      | 3                                                      |
| <i>Somniosus</i>                      | 4                                                      |
| <i>Squalus</i>                        | 25                                                     |
| <i>Squaliolus</i>                     | 2                                                      |
| <i>Squatina</i>                       | 22                                                     |
| <i>Trigonognathus</i>                 | 1                                                      |
| <i>Zameus</i>                         | 1                                                      |

Note that *Etmopterus villosus* was not included in the analysis, as its *Etmopterus* subclade designation is unclear [23].

R protocol:

```
R version 3.0.3 (2014-03-06) -- "Warm Puppy"
```

```
Copyright (C) 2014 The R Foundation for Statistical Computing
```

```
Platform: x86_64-w64-mingw32/x64 (64-bit)
```

```
> library (laser)
```

```
Lade nötiges Paket: ape
```

```
Lade nötiges Paket: geiger
```

```
#loading timetree estimated with BEAST.
```

```
> read.tree ("172.tr")->tree
```

```
> tree
```

Phylogenetic tree with 28 tips and 27 internal nodes.

Tip labels:

Centrophorus\_moluccensis, Deania\_sp, Etmopterus\_gracilispinis, Etmopterus\_spinax, Etmopterus\_molleri, Etmopterus\_sheikoi, ...

Rooted; includes branch lengths.

#loading richness table including species richness information for each branch in the tree.

```
> read.csv("172richness_2.csv") ->richness
```

```
> richness
```

```
      taxon ntaxa
1  Isistius_brasiliensis  2
2   Hexanchus_griseus  6
3   Dalatias_licha  1
4  Etmopterus_molleri 11
5 Centroselachus_crepidater  1
6  Trigonognathus_kabeyai  1
7  Centroscyllium_fabricii  7
8   Etmopterus_spinax 10
9   Etmopterus_sheikoi  1
10 Somniosus_microcephalus  4
11 Euprotomicrus_bispinatus  1
12  Pliotrema_warreni  1
13 Pristiophorus_japonicus  7
14  Cirrhigaleus_asper  3
15  Squalus_acanthias 25
16 Scymnodon_plunketi  1
17  Aculeola_nigra  1
18  Centroscymnus_coelolepis  3
19  Zameus_squamulosus  2
20  Squatina_nebulosa 22
21 Etmopterus_gracilispinis  7
22  Oxynotus_paradoxus  5
23  Scymnodon_ringens  3
24  Squaliolus_aliae  2
25 Centrophorus_moluccensis 12
26  Etmopterus_splendidus  8
27  Echinorhinus_brucus  2
28   Deania_sp  4
```

#starting MEDUSA, using AICc as stopping criterion

```
> res1=medusa(tree, richness, warnings=FALSE)
```

Appropriate AICc threshold for tree of 28 tips is: 1.091845.

Step 1: lnLik=-187.6063; aicc=379.4434; model=bd

Step 2: lnLik=-183.8979; aicc=376.5959; shift at node 23; model=yule; cut=stem; # shifts=1

Step 3: lnLik=-181.5832; aicc=374.391; shift at node 35; model=yule; cut=stem; # shifts=2

No significant increase in aicc score. Disregarding subsequent piecewise models.

```
Model.ID Shift.Node Cut.At Model Ln.Lik.part  r epsilon  r.low  r.high
1      1      29 node yule -85.80499 0.0198648  NA 0.0147561 0.0263547
2      2      23 stem yule -4.198604 0.0841583  NA 0.0471845 0.1585100
3      3      35 stem yule -91.57965 0.0410316  NA 0.0308829 0.0535196
```

```
> print(names(res1)) # output list elements
```

```

[1] "control"    "cache"      "model"      "summary"    "zSummary"   "medusaVersion"
[7] "richness"
> print(res1$summary) # show 'summary' object
  Model.ID Shift.Node Cut.At Model Ln.Lik.part   r epsilon  r.low  r.high
1      1      29 node yule -85.80499 0.0198648  NA 0.0147561 0.0263547
2      2      23 stem yule -4.198604 0.0841583  NA 0.0471845 0.1585100
3      3      35 stem yule -91.57965 0.0410316  NA 0.0308829 0.0535196
> summary(res1, criterion="aicc")
      Length Class  Mode
control      3 -none- list
cache        2 -none- list
model       11 -none- list
summary       9 data.frame list
zSummary    756 -none- numeric
medusaVersion 1 -none- numeric
richness      2 data.frame list

#plotting results, plot breakpoints for best AIC model (see GEIGER package manual)
> plot(res1, cex=0.5,label.offset=1, edge.width=2)

```

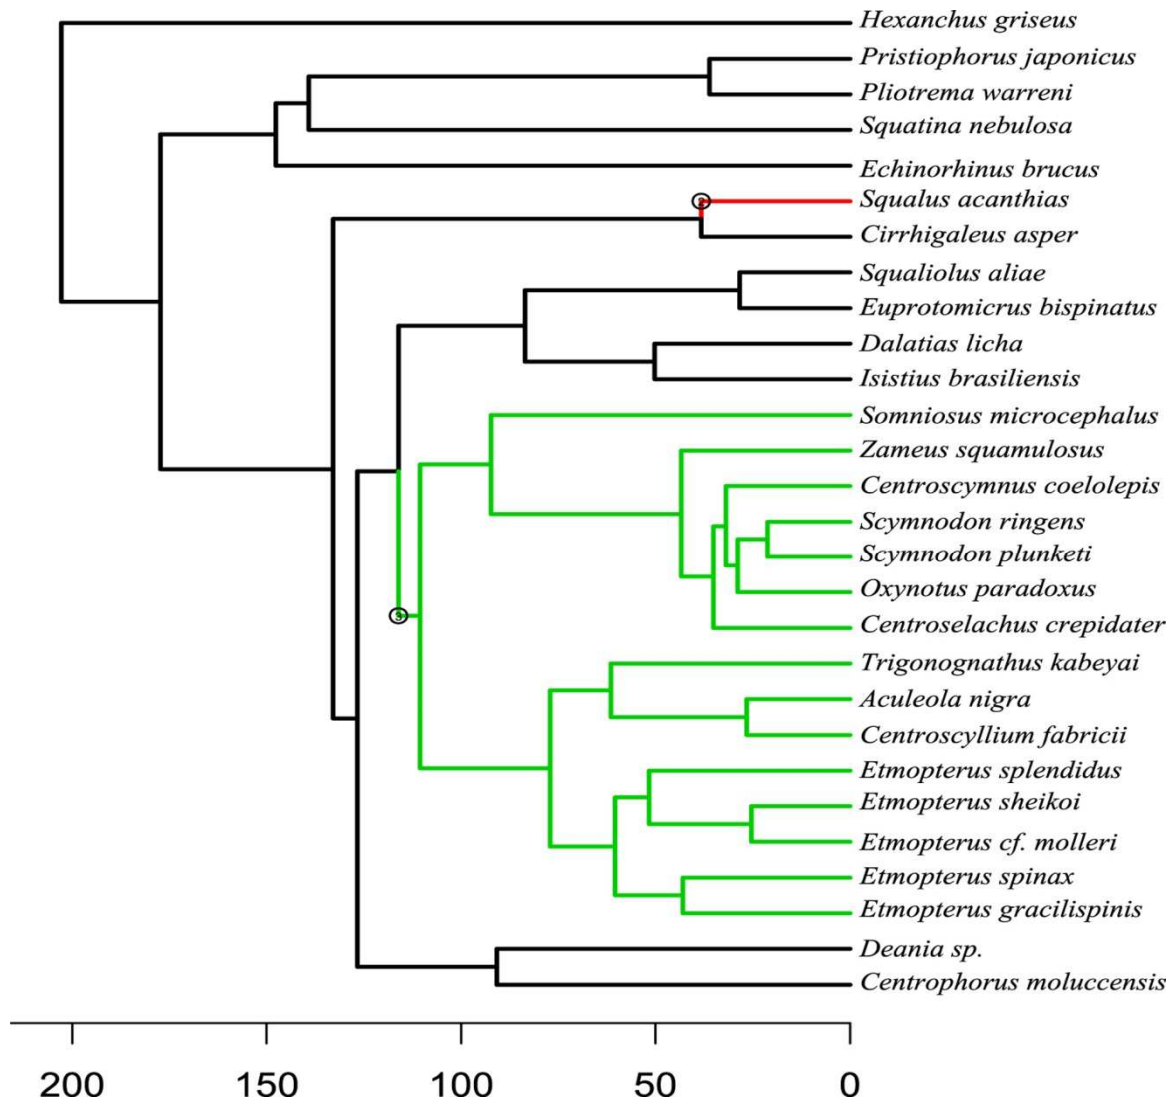

**Figure S8:** Output tree of MEDUSA [42, 43] analysis. Colored branches and dots mark significant increases in rate shifts, i.e. at the radiation of Etmopteridae and Somniosidae as well as the radiation of *Squalus*.

Species richness values were derived from the bibliographic database [www.shark-references.com](http://www.shark-references.com) (accessed 18.04.2015) [1].

GEIGER Package [42] for ancestral character state reconstruction of occurrence of Bioluminescence

Table S6: Presence and absence of photophores in Squaliform sharks based on different information tested in the ancestral character state reconstructions.

| taxon                            | Presence of photophores (0=absent, 1=present; assuming Somniosidae as non-luminous) | Presence of photophores (0=absent, 1=present; based on observations in this study) | Presence of photophores (0=absent, 1=present; based on [8]) |
|----------------------------------|-------------------------------------------------------------------------------------|------------------------------------------------------------------------------------|-------------------------------------------------------------|
| <i>Aculeola nigra</i>            | 1                                                                                   | 1                                                                                  | 1                                                           |
| <i>Centrophorus moluccensis</i>  | 0                                                                                   | 0                                                                                  | 0                                                           |
| <i>Centroselachus crepidater</i> | 0                                                                                   | 0                                                                                  | 1                                                           |
| <i>Centroscyllium fabricii</i>   | 1                                                                                   | 1                                                                                  | 1                                                           |
| <i>Centroscymnus coelolepis</i>  | 0                                                                                   | 0                                                                                  | 1                                                           |
| <i>Cirrhigaleus asper</i>        | 0                                                                                   | 0                                                                                  | 0                                                           |
| <i>Dalatias licha</i>            | 1                                                                                   | 1                                                                                  | 1                                                           |
| <i>Deania sp.</i>                | 0                                                                                   | 0                                                                                  | 0                                                           |
| <i>Echinorhinus brucus</i>       | 0                                                                                   | 0                                                                                  | 0                                                           |
| <i>Etmopterus cf. molleri</i>    | 1                                                                                   | 1                                                                                  | 1                                                           |
| <i>Etmopterus gracilispinis</i>  | 1                                                                                   | 1                                                                                  | 1                                                           |
| <i>Etmopterus sheikoi</i>        | 1                                                                                   | 1                                                                                  | 1                                                           |
| <i>Etmopterus spinax</i>         | 1                                                                                   | 1                                                                                  | 1                                                           |
| <i>Etmopterus splendidus</i>     | 1                                                                                   | 1                                                                                  | 1                                                           |
| <i>Euprotomicrus bispinatus</i>  | 1                                                                                   | 1                                                                                  | 1                                                           |
| <i>Hexanchus griseus</i>         | 0                                                                                   | 0                                                                                  | 0                                                           |
| <i>Isistius brasiliensis</i>     | 1                                                                                   | 1                                                                                  | 1                                                           |
| <i>Oxynotus paradoxus</i>        | 0                                                                                   | 0                                                                                  | 0                                                           |
| <i>Pliotrema warreni</i>         | 0                                                                                   | 0                                                                                  | 0                                                           |
| <i>Pristiophorus japonicus</i>   | 0                                                                                   | 0                                                                                  | 0                                                           |
| <i>Scymnodon plunketi</i>        | 0                                                                                   | 0                                                                                  | 1                                                           |
| <i>Scymnodon ringens</i>         | 0                                                                                   | 0                                                                                  | 1                                                           |
| <i>Somniosus microcephalus</i>   | 0                                                                                   | 0                                                                                  | 0                                                           |
| <i>Squalus acanthias</i>         | 0                                                                                   | 0                                                                                  | 0                                                           |
| <i>Squaliolus aliae</i>          | 1                                                                                   | 1                                                                                  | 1                                                           |
| <i>Squatina nebulosa</i>         | 0                                                                                   | 0                                                                                  | 0                                                           |

|                               |   |   |   |
|-------------------------------|---|---|---|
| <i>Trigonognathus kabeyai</i> | 1 | 1 | 1 |
| <i>Zameus squamulosus</i>     | 0 | 1 | 1 |

R protocol:

```
R version 3.0.3 (2014-03-06) -- "Warm Puppy"
Copyright (C) 2014 The R Foundation for Statistical Computing
Platform: x86_64-w64-mingw32/x64 (64-bit)

> library (laser)

#loading different tables containing information on presence or absence of photphores in taxa.
#Lumi.csv= Table 4, column 1 as example.
> read.csv ("Lumi.csv")
      taxon Lumi2
1  Isistius_brasiliensis  1  0
2   Hexanchus_griseus   0  0
3   Dalatias_licha     1  0
4   Etmopterus_molleri  1  0
5 Centroselachus_crepidater  0  0
6  Trigonognathus_kabeyai  1  0
7  Centroscyllium_fabricii  1  0
8   Etmopterus_spinax   1  0
9   Etmopterus_sheikoi  1  0
10 Somniosus_microcephalus  0  0
11 Euprotomicrus_bispinatus  1  0
12  Pliotrema_warreni    0  0
13 Pristiophorus_japonicus  0  0
14  Cirrhigaleus_asper   0  0
15  Squalus_acanthias    0  0
16  Scymnodon_plunketi   0  0
17   Aculeola_nigra     1  0
18  Centroscymnus_coelolepis  0  0
19  Zameus_squamulosus   0  0
20  Squatina_nebulosa    0  0
21 Etmopterus_gracilispinis  1  0
22  Oxynotus_paradoxus   0  0
23  Scymnodon_ringens    0  0
24  Squaliolus_aliae     1  0
25 Centrophorus_moluccensis  0  0
26  Etmopterus_splendidus  1  0
27  Echinorhinus_brucus  0  0
28   Deania_sp         0  0
> read.csv ("Lumi.csv") -> Lumi.dat
> data.frame(Lumi.dat[,2:3]) -> LumiData
> rownames(LumiData) <- Lumi.dat[,1]
> attach(LumiData)
> Lumi2
[1] 1 0 1 1 0 1 1 1 1 0 1 0 0 0 0 0 1 0 0 0 1 0 0 0 1 0 0 1 0 1 0 0
> names(Lumi2) <- rownames(LumiData)
> name.check(172.tre, LumiData) -> LumiOverlap
> read.tree ("172.tre") -> tree1
> plot (tree1)
> name.check(tree1, LumiData) -> LumiOverlap
> plot (LumiOverlap)
> name.check(tree1, LumiData)
```

```
[1] "OK"
> Lumi2Label <- character(length(tree1$tip.label))
> names(Lumi2Label) <- names(Lumi2)
> Lumi2Label[Lumi2==0] <- "red"
> Lumi2Label[Lumi2==1] <- "blue"
> plot(tree1, cex=0.5, label.offset=2)
> points(rep(104, length(tree1$tip.label)), 1:length(tree1$tip.label), pch=22,
bg=Lumi2Label[tree1$tip.label], cex=0.5, lwd=0.25)
> ace(Lumi2, tree1, type="discrete") -> tree1Lumi2
> tree1Lumi2
```

#### Ancestral Character Estimation

```
Call: ace(x = Lumi2, phy = tree1, type = "discrete")
```

```
Log-likelihood: -8.745127
```

#### Rate index matrix:

```
0 1
0 . 1
1 1 .
```

#### Parameter estimates:

```
rate index estimate std-err
1 0.001 6e-04
```

#### Scaled likelihoods at the root (type '...\$lik.anc' to get them for all nodes):

```
0 1
0.994056219 0.005943781
```

#### #plotting results on timetree estimated with BEAST

```
> plot(tree1, show.node.label=FALSE, label.offset=3, cex=0.4)
> points(rep(105, length(tree1$tip.label)), 1:length(tree1$tip.label), pch=22,
bg=Lumi2Label[tree1$tip.label], cex=0.5, lwd=0.25)
> nodelabels(pie=tree1Lumi2$lik.anc, cex=0.5)
```



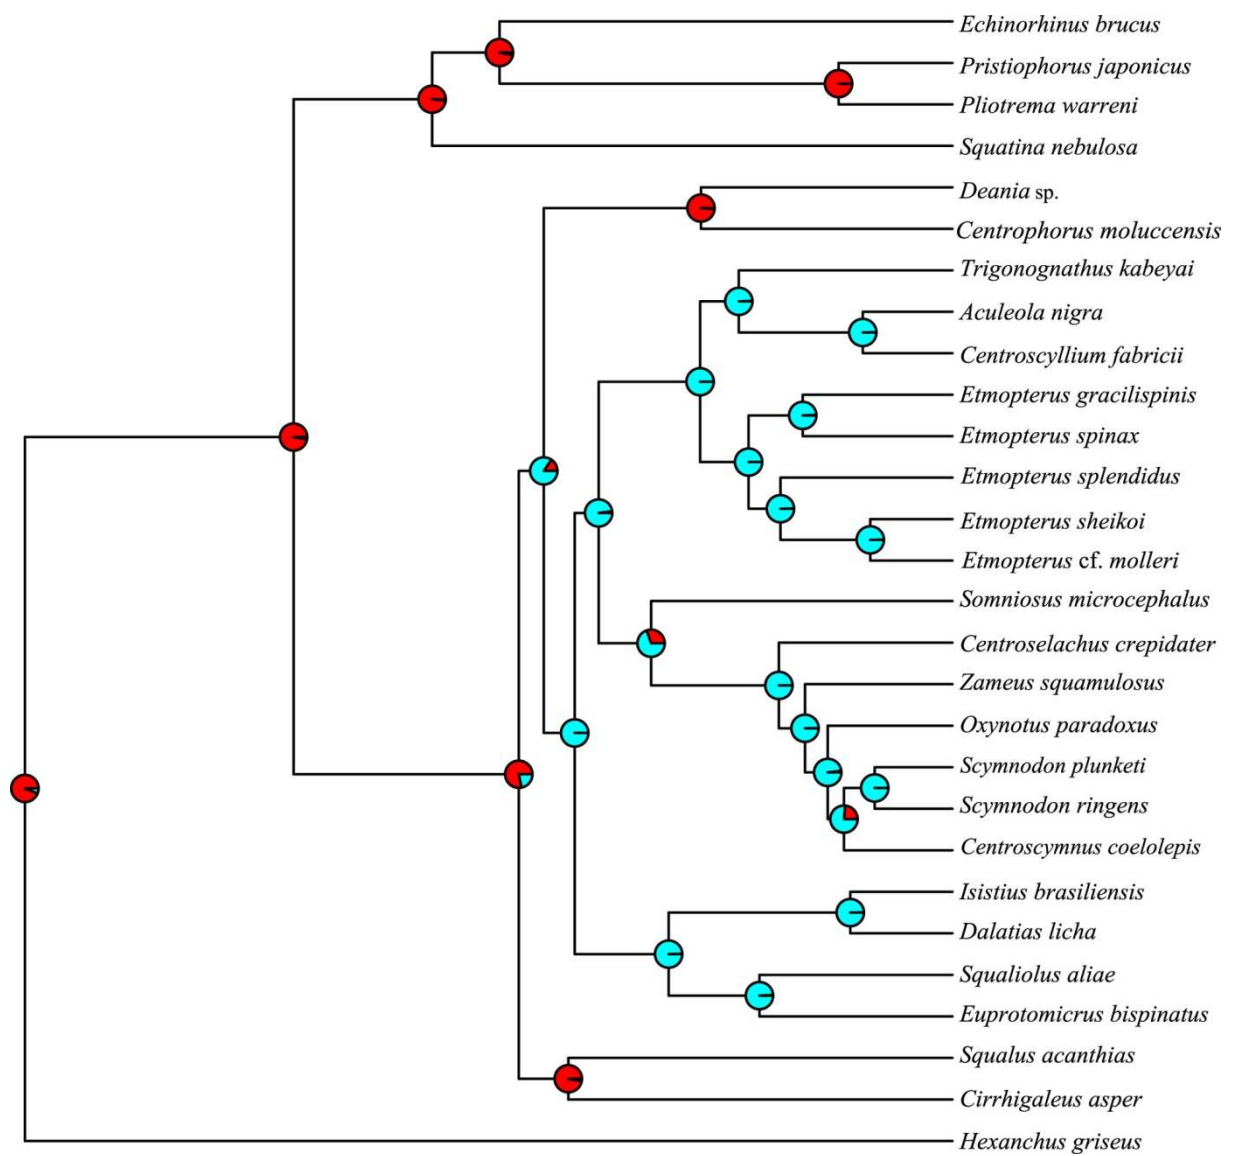

**Figure S9:** ancestral bioluminescence of Squaliformes. Pie charts indicate the probability that ancestral taxa are luminescent (blue) or not (red). Families Etmopteridae and Dalatiidae were coded as luminous as well as genera *Centroselachus*, *Centroscymnus*, *Scymnodon*, and *Zameus* within Somniosidae referring to [8].
